# Supplementary material for: Proteomic landscape of seminal plasma associated with dairy bull fertility
Source: PubMed Central journal article supplement (PMC6218504; doi:10.1038/s41598-018-34152-w), 2018-11-05
Supplement: 41598_2018_34152_MOESM1_ESM.pdf [file 41598_2018_34152_MOESM1_ESM.pdf]

Proteomic landscape of seminal plasma associated with dairy bull fertility

Arabela Guedes de Azevedo Viana,

Aline Maria Araújo Martins,

Arthur Henriques Pontes,

Wagner Fontes,

Mariana de Souza Castro,

Carlos André Ornelas Ricart,

Marcelo Valle de Sousa,

Abdullah Kaya,

Einko Topper,

Erdogan Memili,

Arlindo de Alencar Araripe Noronha Moura

**Supplementary table S1.** Proteins of the bull seminal plasma as identified by DDA (data dependent acquisition) label-free mass spectrometry and tools of bioinformatics (Progenesis QI and UniProt database). The list of proteins includes those exclusively detected in high (HF) and low (LF) fertility bulls as well as those common (C) to both groups.

| Accession number<br>(Uniprot) | Description                                    | Group | Coverage<br>(%) | #Peptides | #Unique | PTM | Avg. Mass<br>(mDa) |
|-------------------------------|------------------------------------------------|-------|-----------------|-----------|---------|-----|--------------------|
| tr A7Z057 A7Z057_BOVIN        | 14-3-3 protein gamma                           | HF    | 17              | 4         | 1       | Y   | 28303              |
| P68252 1433G_BOVIN            | 14-3-3 protein gamma                           | HF    | 17              | 4         | 1       | Y   | 28253              |
| Q0VC36 1433S_BOVIN            | 14-3-3 protein sigma                           | HF    | 13              | 4         | 1       | Y   | 27849              |
| Q3SZI4 1433T_BOVIN            | 14-3-3 protein theta                           | HF    | 11              | 4         | 0       | N   | 27764              |
| tr B0JYM5 B0JYM5_BOVIN        | 14-3-3 protein theta                           | HF    | 11              | 4         | 0       | N   | 27764              |
| P63103 1433Z_BOVIN            | 14-3-3 protein zeta/delta                      | C     | 52              | 13        | 10      | Y   | 27745              |
| A8YXY3 SEP15_BOVIN            | 15 kDa selenoprotein                           | HF    | 32              | 3         | 3       | Y   | 17975              |
| tr F1MLV1 F1MLV1_BOVIN        | 26S protease regulatory subunit 10B            | HF    | 4               | 1         | 1       | N   | 44173              |
| Q2KIW6 PRS10_BOVIN            | 26S protease regulatory subunit 10B            | HF    | 4               | 1         | 1       | N   | 44074              |
| P56701 PSMD2_BOVIN            | 26S proteasome non-ATPase regulatory subunit 2 | HF    | 2               | 1         | 1       | Y   | 100258             |
| Q3ZBZ1 CAB45_BOVIN            | 45 kDa calcium-binding protein                 | C     | 70              | 18        | 18      | Y   | 41106              |
| tr F1N2L9 F1N2L9_BOVIN        | 4-trimethylaminobutyraldehyde dehydrogenase    | C     | 2               | 1         | 1       | N   | 53991              |
| Q2KJH9 AL9A1_BOVIN            | 4-trimethylaminobutyraldehyde dehydrogenase    | C     | 2               | 1         | 1       | N   | 53977              |
| Q05927 5NTD_BOVIN             | 5'-nucleotidase                                | C     | 61              | 31        | 16      | Y   | 62966              |
| tr G3MZC1 G3MZC1_BOVIN        | 5'-nucleotidase (Fragment)                     | HF    | 54              | 18        | 3       | Y   | 35982              |
| Q75WB5 OPLA_BOVIN             | 5-oxoprolinase                                 | LF    | 1               | 1         | 1       | Y   | 137465             |
| tr F1ME97 F1ME97_BOVIN        | 5-oxoprolinase                                 | LF    | 1               | 1         | 1       | Y   | 137354             |
|                               | 6-phosphogluconate dehydrogenase               |       |                 |           |         |     |                    |
| tr Q3ZCI4 Q3ZCI4_BOVIN        | decarboxylating                                | HF    | 2               | 1         | 1       | N   | 53077              |
| tr F1MKH8 F1MKH8_BOVIN        | 72 kDa type IV collagenase                     | C     | 10              | 2         | 2       | N   | 73848              |
| Q0VCX2 GRP78_BOVIN            | 78 kDa glucose-regulated protein               | C     | 20              | 11        | 9       | N   | 72400              |
|                               | Abnormal spindle-like microcephaly-associated  |       |                 |           |         |     |                    |
| tr F1MM80 F1MM80_BOVIN        | protein homolog                                | C     | 0               | 1         | 1       | Y   | 405871             |

|                        |                                                                            |    |    |    |    |   |        |
|------------------------|----------------------------------------------------------------------------|----|----|----|----|---|--------|
| P62285 ASPM_BOVIN      | Abnormal spindle-like microcephaly-associated protein homolog (Fragment)   | HF | 0  | 1  | 1  | Y | 395924 |
| tr A0JND7 A0JND7_BOVIN | ABO blood group (Transferase A alpha 1-3-N-acetylgalactosaminyltransferase | LF | 9  | 2  | 2  | N | 41926  |
| P23795 ACES_BOVIN      | Acetylcholinesterase                                                       | C  | 2  | 3  | 0  | N | 67664  |
| Q17QB3 ASAH1_BOVIN     | Acid ceramidase                                                            | LF | 21 | 6  | 6  | N | 44965  |
| tr G3M8V1 G3M8V1_BOVIN | Acid phosphatase type 5                                                    | C  | 16 | 4  | 4  | Y | 38237  |
| Q3ZC91 ASM3A_BOVIN     | Acid sphingomyelinase-like phosphodiesterase 3a                            | C  | 7  | 2  | 2  | N | 51221  |
| tr F1MUI5 F1MUI5_BOVIN | Acid sphingomyelinase-like phosphodiesterase 3a                            | C  | 7  | 2  | 2  | N | 51175  |
| tr P79343 P79343_BOVIN | Acrosin                                                                    | C  | 8  | 3  | 3  | Y | 41722  |
| P01000 IAC1_BOVIN      | Acrosin inhibitor 1                                                        | C  | 60 | 6  | 6  | Y | 7379   |
| tr Q32KR2 Q32KR2_BOVIN | Acrosomal vesicle protein 1                                                | LF | 14 | 3  | 3  | Y | 28953  |
| tr A4IFM8 A4IFM8_BOVIN | Actin alpha 1 skeletal muscle                                              | HF | 32 | 16 | 1  | Y | 42023  |
| Q3ZC07 ACTC_BOVIN      | Actin alpha cardiac muscle 1                                               | C  | 32 | 17 | 0  | Y | 42019  |
| P68138 ACTS_BOVIN      | Actin alpha skeletal muscle                                                | C  | 32 | 17 | 0  | Y | 42051  |
| P60712 ACTB_BOVIN      | Actin cytoplasmic 1                                                        | C  | 75 | 26 | 11 | Y | 41737  |
| P63258 ACTG_BOVIN      | Actin cytoplasmic 2                                                        | C  | 75 | 26 | 11 | Y | 41793  |
| A6QQV9 AF1L1_BOVIN     | Actin filament-associated protein 1-like 1                                 | HF | 2  | 2  | 2  | Y | 85931  |
| E1BNG3 ASCC3_BOVIN     | Activating signal cointegrator 1 complex subunit 3                         | HF | 1  | 2  | 1  | N | 250763 |
| tr Q3MHY9 Q3MHY9_BOVIN | ACTR1A protein (Fragment)                                                  | HF | 16 | 4  | 4  | N | 41463  |
| P07107 ACBP_BOVIN      | Acyl-CoA-binding protein                                                   | C  | 61 | 6  | 6  | Y | 10044  |
| tr Q2NKZ3 Q2NKZ3_BOVIN | ADAM metallopeptidase domain 32                                            | C  | 7  | 4  | 4  | Y | 82546  |
| P00570 KAD1_BOVIN      | Adenylate kinase isoenzyme 1                                               | C  | 74 | 13 | 13 | Y | 21664  |
| O62827 ADML_BOVIN      | ADM                                                                        | C  | 49 | 13 | 13 | Y | 20963  |
| tr B0JYQ0 B0JYQ0_BOVIN | ALB protein                                                                | LF | 64 | 47 | 1  | Y | 69294  |
| tr Q5E962 Q5E962_BOVIN | Aldo-keto reductase family 1 member B1                                     | C  | 76 | 18 | 16 | Y | 36050  |
| Q5EA79 GALM_BOVIN      | Aldose 1-epimerase                                                         | HF | 5  | 1  | 1  | N | 37614  |
| P16116 ALDR_BOVIN      | Aldose reductase                                                           | C  | 76 | 18 | 16 | Y | 35919  |
| tr A4FUG6 A4FUG6_BOVIN | ALG2 protein                                                               | LF | 2  | 1  | 1  | Y | 46831  |
| P09487 PPBT_BOVIN      | Alkaline phosphatase tissue-nonspecific isozyme                            | C  | 7  | 3  | 3  | N | 57193  |
| tr Q28921 Q28921_BOVIN | Alpha 1-antichymotrypsin (Fragment)                                        | HF | 6  | 1  | 1  | N | 28571  |
| tr Q5GN72 Q5GN72_BOVIN | Alpha-1-acid glycoprotein                                                  | C  | 7  | 1  | 1  | N | 23158  |
| Q3SZR3 A1AG_BOVIN      | Alpha-1-acid glycoprotein                                                  | C  | 7  | 1  | 1  | N | 23182  |

|                        |                                                      |    |    |    |    |   |        |
|------------------------|------------------------------------------------------|----|----|----|----|---|--------|
| tr Q27983 Q27983_BOVIN | Alpha1-antichymotrypsin isoform pHHK11<br>(Fragment) | HF | 7  | 1  | 1  | N | 22711  |
| P34955 A1AT_BOVIN      | Alpha-1-antiproteinase                               | C  | 4  | 1  | 1  | N | 46104  |
| Q2KJF1 A1BG_BOVIN      | Alpha-1B-glycoprotein                                | LF | 10 | 3  | 3  | Y | 53554  |
| P28800 A2AP_BOVIN      | Alpha-2-antiplasmin                                  | C  | 3  | 1  | 1  | N | 54711  |
| P12763 FETUA_BOVIN     | Alpha-2-HS-glycoprotein                              | LF | 9  | 2  | 2  | Y | 38419  |
| tr B0JYN6 B0JYN6_BOVIN | Alpha-2-HS-glycoprotein                              | LF | 9  | 2  | 2  | Y | 38419  |
| Q7SIH1 A2MG_BOVIN      | Alpha-2-macroglobulin                                | C  | 18 | 20 | 19 | Y | 167575 |
| Q3B7N2 ACTN1_BOVIN     | Alpha-actinin-1                                      | HF | 4  | 3  | 2  | Y | 102980 |
| Q9XSJ4 ENOA_BOVIN      | Alpha-enolase                                        | C  | 18 | 6  | 6  | N | 47326  |
| tr F1MB08 F1MB08_BOVIN | Alpha-enolase                                        | LF | 12 | 3  | 3  | N | 47284  |
| tr G5E5M8 G5E5M8_BOVIN | Alpha-mannosidase                                    | C  | 11 | 10 | 4  | Y | 115130 |
| tr E1BHP0 E1BHP0_BOVIN | Alpha-mannosidase                                    | C  | 44 | 32 | 22 | Y | 115228 |
| tr F1MWT0 F1MWT0_BOVIN | Alpha-mannosidase                                    | C  | 42 | 27 | 6  | Y | 115861 |
| tr A8YXY9 A8YXY9_BOVIN | Alpha-mannosidase                                    | HF | 48 | 21 | 1  | Y | 85396  |
| Q58DH9 NAGAB_BOVIN     | Alpha-N-acetylgalactosaminidase                      | LF | 3  | 1  | 1  | N | 46533  |
| tr Q1RMM9 Q1RMM9_BOVIN | Alpha-N-acetylgalactosaminidase                      | LF | 3  | 1  | 1  | N | 46561  |
| tr Q08E54 Q08E54_BOVIN | Amyloid beta (A4) protein                            | C  | 14 | 5  | 5  | Y | 78597  |
| tr A6H6X2 A6H6X2_BOVIN | ANG2 protein                                         | C  | 43 | 5  | 5  | Y | 17155  |
| tr Q2NKV1 Q2NKV1_BOVIN | Angiogenin ribonuclease RNase A family 5             | C  | 56 | 10 | 10 | Y | 17004  |
| P10152 ANG1_BOVIN      | Angiogenin-1                                         | C  | 56 | 10 | 10 | Y | 16970  |
| P80929 ANG2_BOVIN      | Angiogenin-2                                         | C  | 51 | 5  | 5  | Y | 14522  |
| tr Q9BDG1 Q9BDG1_BOVIN | Angiotensin I converting enzyme (Fragment)           | C  | 73 | 6  | 3  | Y | 14326  |
| tr F1MQJ0 F1MQJ0_BOVIN | Angiotensin-converting enzyme (Fragment)             | C  | 30 | 39 | 34 | Y | 141241 |
| P15497 APOA1_BOVIN     | Apolipoprotein A-I                                   | C  | 32 | 7  | 7  | Y | 30276  |
| tr V6F9A2 V6F9A2_BOVIN | Apolipoprotein A-I                                   | C  | 32 | 7  | 7  | Y | 30276  |
| P81644 APOA2_BOVIN     | Apolipoprotein A-II                                  | C  | 16 | 1  | 1  | N | 11202  |
| Q08DD1 ARSA_BOVIN      | Arylsulfatase A                                      | C  | 16 | 3  | 3  | N | 53807  |
| Q148F3 ARSK_BOVIN      | Arylsulfatase K                                      | C  | 10 | 3  | 3  | N | 61361  |
| Q2HJH1 DNPEP_BOVIN     | Aspartyl aminopeptidase                              | C  | 41 | 11 | 11 | Y | 51828  |
| tr Q3MHZ3 Q3MHZ3_BOVIN | ATP6AP1 protein (Fragment)                           | C  | 22 | 6  | 6  | Y | 51519  |
| tr A7E3T8 A7E3T8_BOVIN | ATP-binding cassette sub-family G member 2           | HF | 3  | 1  | 1  | Y | 73078  |
| tr B2D1N9 B2D1N9_BOVIN | ATP-binding cassette sub-family G member 2           | HF | 3  | 1  | 1  | Y | 73097  |
| Q32PF2 ACLY_BOVIN      | ATP-citrate synthase                                 | HF | 1  | 1  | 1  | N | 119789 |

|                        |                                                         |    |    |    |    |   |        |
|------------------------|---------------------------------------------------------|----|----|----|----|---|--------|
| P17453 BPI_BOVIN       | Bactericidal permeability-increasing protein            | LF | 2  | 1  | 1  | N | 53442  |
| tr F1MQ17 F1MQ17_BOVIN | Bactericidal permeability-increasing protein (Fragment) | LF | 2  | 1  | 1  | N | 49002  |
| tr Q3ZBX0 Q3ZBX0_BOVIN | Basigin                                                 | LF | 5  | 1  | 1  | N | 29773  |
| Q5EA01 B4GA1_BOVIN     | Beta-1 4-glucuronyltransferase 1                        | LF | 18 | 3  | 3  | N | 47231  |
| P01888 B2MG_BOVIN      | Beta-2-microglobulin                                    | C  | 58 | 8  | 8  | Y | 13677  |
| tr A7LM96 A7LM96_BOVIN | Beta-defensin                                           | C  | 15 | 1  | 1  | Y | 9310   |
| tr G3N236 G3N236_BOVIN | Beta-defensin (Fragment)                                | C  | 16 | 1  | 1  | Y | 10056  |
| tr G8CY17 G8CY17_BOVIN | Beta-defensin (Fragment)                                | C  | 21 | 4  | 4  | Y | 10785  |
| tr G8CY19 G8CY19_BOVIN | Beta-defensin (Fragment)                                | C  | 31 | 3  | 3  | Y | 11397  |
| tr G8CY20 G8CY20_BOVIN | Beta-defensin (Fragment)                                | C  | 10 | 2  | 2  | Y | 9237   |
| tr F1MBP7 F1MBP7_BOVIN | Beta-defensin 10                                        | C  | 40 | 3  | 3  | Y | 6954   |
| P46168 DFB10_BOVIN     | Beta-defensin 10                                        | C  | 40 | 3  | 3  | Y | 6928   |
| P46169 DFB11_BOVIN     | Beta-defensin 11                                        | HF | 33 | 3  | 1  | Y | 6507   |
| Q32P86 DB119_BOVIN     | Beta-defensin 119                                       | C  | 28 | 2  | 2  | Y | 9805   |
| P46170 DFB12_BOVIN     | Beta-defensin 12                                        | HF | 53 | 3  | 1  | Y | 4106   |
| tr G8CY12 G8CY12_BOVIN | Beta-defensin 126 (Fragment)                            | C  | 27 | 3  | 3  | Y | 9374   |
| tr G8CY08 G8CY08_BOVIN | Beta-defensin 126 (Fragment)                            | C  | 7  | 1  | 1  | N | 11183  |
| tr G8CY14 G8CY14_BOVIN | Beta-defensin 129 (Fragment)                            | C  | 31 | 7  | 6  | Y | 17856  |
| P46171 DFB13_BOVIN     | Beta-defensin 13                                        | HF | 48 | 3  | 1  | Y | 4450   |
| tr G8CY09 G8CY09_BOVIN | Beta-defensin 132                                       | HF | 8  | 1  | 1  | Y | 9337   |
| tr Q5W5H4 Q5W5H4_BOVIN | Beta-defensin 405 (Fragment)                            | C  | 60 | 3  | 3  | Y | 4775   |
| O18815 DFBC7_BOVIN     | Beta-defensin C7 (Fragment)                             | C  | 38 | 4  | 2  | Y | 5650   |
| tr A5D7U5 A5D7U5_BOVIN | Beta-galactosidase                                      | C  | 40 | 18 | 18 | Y | 73475  |
| tr F1MUF4 F1MUF4_BOVIN | Beta-galactosidase                                      | C  | 40 | 18 | 18 | Y | 73475  |
| tr F1MDX6 F1MDX6_BOVIN | Beta-galactosidase (Fragment)                           | C  | 7  | 2  | 1  | N | 75483  |
| tr O18974 O18974_BOVIN | Beta-galactoside alpha-2 6-sialyltransferase            | C  | 38 | 14 | 14 | Y | 46246  |
| tr A3KMY8 A3KMY8_BOVIN | Beta-glucuronidase                                      | C  | 38 | 19 | 17 | Y | 74470  |
| tr H7BWW2 H7BWW2_BOVIN | Beta-hexosaminidase                                     | C  | 54 | 28 | 19 | Y | 61262  |
| tr E1B9E8 E1B9E8_BOVIN | Beta-hexosaminidase                                     | C  | 33 | 19 | 10 | Y | 62467  |
| Q0V8R6 HEXA_BOVIN      | Beta-hexosaminidase subunit alpha                       | C  | 6  | 2  | 2  | N | 60353  |
| Q5I597 BHMT1_BOVIN     | Betaine--homocysteine S-methyltransferase 1             | HF | 2  | 1  | 1  | N | 44878  |
| Q29444 MANBA_BOVIN     | Beta-mannosidase                                        | C  | 59 | 38 | 36 | Y | 101176 |
| tr A6QLB0 A6QLB0_BOVIN | Beta-mannosidase                                        | C  | 59 | 38 | 36 | Y | 101124 |

|                        |                                                                |    |    |    |    |   |        |
|------------------------|----------------------------------------------------------------|----|----|----|----|---|--------|
| P13600 NGF_BOVIN       | Beta-nerve growth factor                                       | C  | 48 | 18 | 18 | Y | 26669  |
| tr F1MJM4 F1MJM4_BOVIN | Biotinidase                                                    | LF | 5  | 3  | 3  | N | 58310  |
| A6QQ07 BTD_BOVIN       | Biotinidase                                                    | LF | 5  | 3  | 3  | N | 58353  |
| tr A5D7K0 A5D7K0_BOVIN | BLVRA protein                                                  | LF | 2  | 1  | 1  | N | 33644  |
| Q2KJH1 BMP4_BOVIN      | Bone morphogenetic protein 4                                   | C  | 13 | 3  | 3  | Y | 46626  |
| tr E5DCU8 E5DCU8_BOVIN | Bone morphogenetic protein 4 (Fragment)                        | C  | 14 | 3  | 3  | Y | 42751  |
| tr Q5I4I9 Q5I4I9_BOVIN | Bone morphogenetic protein 4 (Fragment)                        | C  | 14 | 3  | 3  | Y | 44544  |
| Q8SPU5 BPIA1_BOVIN     | BPI fold-containing family A member 1                          | C  | 11 | 2  | 2  | N | 26576  |
| Q8SPF8 BPIB1_BOVIN     | BPI fold-containing family B member 1                          | C  | 52 | 19 | 19 | Y | 51700  |
| tr F1MLW2 F1MLW2_BOVIN | BPI fold-containing family B member 1                          | C  | 52 | 19 | 19 | Y | 51716  |
| P80724 BASP1_BOVIN     | Brain acid soluble protein 1                                   | C  | 57 | 7  | 7  | N | 23011  |
| P39873 RNBR_BOVIN      | Brain ribonuclease                                             | C  | 45 | 14 | 4  | Y | 18450  |
| Q95106 BDNF_BOVIN      | Brain-derived neurotrophic factor                              | HF | 3  | 1  | 1  | N | 28174  |
| tr F1N7Q0 F1N7Q0_BOVIN | BTB (POZ) domain containing 12                                 | HF | 1  | 2  | 0  | N | 197631 |
| tr O46625 O46625_BOVIN | BTrappin-2 protein (Fragment)                                  | C  | 51 | 6  | 4  | Y | 14324  |
| tr A6H758 A6H758_BOVIN | C11H9ORF9 protein                                              | C  | 6  | 1  | 1  | N | 25006  |
| Q3SX46 C1GLC_BOVIN     | C1GALT1-specific chaperone 1                                   | C  | 19 | 4  | 4  | Y | 36441  |
| tr A5PJL8 A5PJL8_BOVIN | C1QTNF5 protein                                                | C  | 56 | 11 | 10 | Y | 25349  |
| Q6R8F2 CADH1_BOVIN     | Cadherin-1                                                     | C  | 6  | 6  | 6  | Y | 97938  |
| tr F1N619 F1N619_BOVIN | Cadherin-1 (Fragment)                                          | C  | 6  | 6  | 6  | Y | 91860  |
| tr F1MGE7 F1MGE7_BOVIN | Calcium-transporting ATPase                                    | LF | 1  | 1  | 1  | N | 109266 |
| tr E1BMQ6 E1BMQ6_BOVIN | Calcium-transporting ATPase                                    | C  | 1  | 1  | 1  | N | 109321 |
| P62157 CALM_BOVIN      | Calmodulin                                                     | C  | 36 | 2  | 2  | N | 16838  |
| tr F1MLH6 F1MLH6_BOVIN | Calmodulin                                                     | C  | 36 | 2  | 2  | N | 16847  |
| tr A5D7J6 A5D7J6_BOVIN | CALR protein                                                   | HF | 30 | 6  | 6  | Y | 48098  |
| P52193 CALR_BOVIN      | Calreticulin                                                   | HF | 30 | 6  | 6  | Y | 48039  |
| P06833 PYY2_BOVIN      | Caltrin                                                        | C  | 38 | 9  | 7  | Y | 8976   |
| P00517 KAPCA_BOVIN     | cAMP-dependent protein kinase catalytic subunit alpha          | C  | 27 | 5  | 5  | N | 40620  |
| P00514 KAP0_BOVIN      | cAMP-dependent protein kinase type I-alpha regulatory subunit  | C  | 18 | 5  | 4  | Y | 42893  |
| P00515 KAP2_BOVIN      | cAMP-dependent protein kinase type II-alpha regulatory subunit | HF | 18 | 7  | 6  | N | 45094  |
| P00921 CAH2_BOVIN      | Carbonic anhydrase 2                                           | HF | 18 | 2  | 2  | N | 29114  |

|                        |                                                                       |    |    |    |    |   |        |
|------------------------|-----------------------------------------------------------------------|----|----|----|----|---|--------|
| tr F1N0H3 F1N0H3_BOVIN | Carbonic anhydrase 2 (Fragment)                                       | HF | 19 | 2  | 2  | N | 27750  |
| tr E1BN79 E1BN79_BOVIN | Carboxylic ester hydrolase                                            | C  | 53 | 29 | 26 | Y | 64339  |
| tr F1MIM4 F1MIM4_BOVIN | Carboxylic ester hydrolase                                            | HF | 2  | 3  | 0  | N | 67021  |
| tr A6BML7 A6BML7_BOVIN | Carboxypeptidase                                                      | C  | 31 | 14 | 14 | Y | 53981  |
| Q17QK3 CBPQ_BOVIN      | Carboxypeptidase Q                                                    | C  | 6  | 2  | 2  | N | 51679  |
| tr Q6VAN8 Q6VAN8_BOVIN | Carcinoembryonic antigen-related cell adhesion molecule 1             | C  | 6  | 2  | 2  | Y | 47944  |
| tr Q6VAN7 Q6VAN7_BOVIN | Carcinoembryonic antigen-related cell adhesion molecule 1 isoform 3Ls | C  | 6  | 2  | 2  | Y | 47167  |
| tr Q6VAN6 Q6VAN6_BOVIN | Carcinoembryonic antigen-related cell adhesion molecule 1 isoform 3S  | C  | 6  | 2  | 2  | Y | 40857  |
| tr Q6VAN5 Q6VAN5_BOVIN | Carcinoembryonic antigen-related cell adhesion molecule 1 isoform 3Ss | C  | 7  | 2  | 2  | Y | 40080  |
| tr J9U8U3 J9U8U3_BOVIN | Cardiomyopathy associated protein 3 (Fragment)                        | HF | 1  | 2  | 2  | Y | 377297 |
| P07688 CATB_BOVIN      | Cathepsin B                                                           | C  | 53 | 15 | 15 | Y | 36661  |
| tr F1MMR6 F1MMR6_BOVIN | Cathepsin D                                                           | C  | 49 | 19 | 19 | Y | 44705  |
| tr Q0VCU3 Q0VCU3_BOVIN | Cathepsin F                                                           | LF | 21 | 7  | 7  | Y | 50893  |
| P25975 CATL1_BOVIN     | Cathepsin L1                                                          | C  | 61 | 18 | 18 | Y | 37347  |
| tr B0JYN1 B0JYN1_BOVIN | Cathepsin L2                                                          | C  | 61 | 18 | 18 | Y | 37347  |
| Q5E998 CATL2_BOVIN     | Cathepsin L2                                                          | C  | 61 | 18 | 18 | Y | 37393  |
| P25326 CATS_BOVIN      | Cathepsin S                                                           | C  | 49 | 10 | 9  | Y | 37176  |
| tr A5PJF7 A5PJF7_BOVIN | C-C motif chemokine                                                   | LF | 39 | 11 | 10 | Y | 11100  |
| P28291 CCL2_BOVIN      | C-C motif chemokine 2                                                 | C  | 55 | 16 | 16 | Y | 11114  |
| tr F1MQT9 F1MQT9_BOVIN | CD44 antigen (Fragment)                                               | HF | 3  | 2  | 2  | N | 84147  |
| tr Q32PA1 Q32PA1_BOVIN | CD59 molecule complement regulatory protein                           | C  | 9  | 1  | 1  | Y | 13663  |
| P30932 CD9_BOVIN       | CD9 antigen                                                           | C  | 20 | 3  | 3  | Y | 25258  |
| tr A6QLC4 A6QLC4_BOVIN | CDH1 protein                                                          | C  | 6  | 6  | 6  | Y | 97975  |
| tr A6QP71 A6QP71_BOVIN | CDH15 protein                                                         | HF | 1  | 1  | 0  | N | 77042  |
| tr Q0VCE8 Q0VCE8_BOVIN | CEACAM8 protein                                                       | C  | 7  | 2  | 2  | Y | 40110  |
| tr Q148D9 Q148D9_BOVIN | Cellular repressor of E1A-stimulated genes 1                          | C  | 55 | 7  | 7  | Y | 23948  |
| tr Q66LI3 Q66LI3_BOVIN | CENP-C (Fragment)                                                     | HF | 3  | 1  | 1  | Y | 37560  |
| tr E1BJ15 E1BJ15_BOVIN | Centrosomal protein of 290 kDa                                        | C  | 1  | 2  | 1  | Y | 290363 |
| Q9TU23 CE290_BOVIN     | Centrosomal protein of 290 kDa (Fragment)                             | C  | 1  | 2  | 1  | Y | 171786 |
| Q1ZYR0 CLN5_BOVIN      | Ceroid-lipofuscinosis neuronal protein 5                              | C  | 19 | 5  | 5  | Y | 41227  |

|                                |                                                    |    |    |    |    |   |        |
|--------------------------------|----------------------------------------------------|----|----|----|----|---|--------|
| Q9XSA7 CLIC4_BOVIN             | Chloride intracellular channel protein 4           | LF | 7  | 1  | 1  | Y | 28727  |
| tr Q32LC5 Q32LC5_BOVIN         | CKLF-like MARVEL transmembrane domain containing 2 | C  | 20 | 2  | 2  | N | 25830  |
| P49951 CLH1_BOVIN              | Clathrin heavy chain 1                             | HF | 3  | 3  | 3  | N | 191587 |
| tr F1MPU0 F1MPU0_BOVIN         | Clathrin heavy chain 1 (Fragment)                  | HF | 3  | 3  | 3  | N | 189936 |
| P17697 CLUS_BOVIN              | Clusterin                                          | C  | 63 | 62 | 59 | Y | 51114  |
| Q28107 FA5_BOVIN               | Coagulation factor V                               | C  | 1  | 3  | 0  | Y | 248981 |
| tr F1MTT3 F1MTT3_BOVIN         | Coagulation factor XII                             | LF | 3  | 1  | 1  | N | 67235  |
| Q3SYW2 CO2_BOVIN               | Complement C2                                      | C  | 11 | 6  | 6  | Y | 82906  |
| tr Q0V7N2 Q0V7N2_BOVIN         | Complement C2                                      | C  | 11 | 6  | 6  | Y | 86999  |
| tr A0A0A0MP91 A0A0A0MP91_BOVIN | Complement C2                                      | C  | 11 | 6  | 6  | Y | 82907  |
| Q2UVX4 CO3_BOVIN               | Complement C3                                      | C  | 35 | 45 | 44 | Y | 187252 |
| P81187 CFAB_BOVIN              | Complement factor B                                | C  | 35 | 17 | 17 | Y | 85366  |
| Q28085 CFAH_BOVIN              | Complement factor H                                | C  | 74 | 80 | 33 | Y | 140374 |
| tr F1MC45 F1MC45_BOVIN         | Complement factor H (Fragment)                     | C  | 63 | 47 | 4  | Y | 96593  |
| tr A0A075TEJ1 A0A075TEJ1_BOVIN | Complement regulatory protein variant              | LF | 13 | 3  | 3  | Y | 46808  |
| tr F1MH70 F1MH70_BOVIN         | Condensin complex subunit 2                        | HF | 6  | 1  | 1  | Y | 80694  |
| tr F1MVI0 F1MVI0_BOVIN         | Contactin-1                                        | C  | 7  | 4  | 4  | Y | 113306 |
| Q28106 CNTN1_BOVIN             | Contactin-1                                        | HF | 7  | 4  | 4  | Y | 113385 |
| Q5EA61 KCRB_BOVIN              | Creatine kinase B-type                             | C  | 4  | 1  | 1  | N | 42719  |
| tr A4IFS7 A4IFS7_BOVIN         | CTSL1 protein                                      | LF | 8  | 3  | 1  | Y | 37150  |
| P55206 ANFC_BOVIN              | C-type natriuretic peptide                         | C  | 56 | 26 | 24 | Y | 13291  |
| A7MBJ5 CAND1_BOVIN             | Cullin-associated NEDD8-dissociated protein 1      | C  | 30 | 21 | 19 | Y | 136375 |
| tr Q1RMP3 Q1RMP3_BOVIN         | CutA divalent cation tolerance homolog (E. coli)   | LF | 48 | 5  | 5  | Y | 16347  |
| tr Q5DPW9 Q5DPW9_BOVIN         | Cystatin E/M                                       | C  | 69 | 13 | 12 | Y | 16356  |
| P01035 CYTC_BOVIN              | Cystatin-C                                         | C  | 50 | 7  | 7  | Y | 16265  |
| tr Q32LP8 Q32LP8_BOVIN         | Cysteine-rich secretory protein 2                  | HF | 11 | 2  | 2  | Y | 27143  |
| tr Q3ZCL0 Q3ZCL0_BOVIN         | Cysteine-rich secretory protein 2                  | C  | 28 | 4  | 4  | Y | 27453  |
| Q0IIF9 CP2U1_BOVIN             | Cytochrome P450 2U1                                | HF | 3  | 2  | 2  | Y | 61997  |
| tr F1MFI9 F1MFI9_BOVIN         | Cytochrome P450 2U1                                | HF | 3  | 2  | 2  | Y | 62031  |
| Q3ZC84 CNBP2_BOVIN             | Cytosolic non-specific dipeptidase                 | HF | 4  | 1  | 1  | N | 52655  |
| tr A5D986 A5D986_BOVIN         | Cytosolic sialic acid 9-O-acetylerase homolog      | C  | 14 | 5  | 5  | N | 59703  |
| tr A6QQL7 A6QQL7_BOVIN         | DCN1-like protein                                  | HF | 5  | 1  | 1  | Y | 28293  |
| tr F1MDM6 F1MDM6_BOVIN         | DCN1-like protein                                  | HF | 5  | 1  | 1  | Y | 28278  |



|                        |                                                                  |    |    |    |    |   |        |
|------------------------|------------------------------------------------------------------|----|----|----|----|---|--------|
| tr A6QPL7 A6QPL7_BOVIN | DDN protein                                                      | HF | 2  | 2  | 1  | N | 66094  |
| Q58CX7 DIA1R_BOVIN     | Deleted in autism-related protein 1 homolog                      | LF | 2  | 1  | 1  | N | 48095  |
| P56541 DNS2A_BOVIN     | Deoxyribonuclease-2-alpha                                        | LF | 8  | 2  | 2  | Y | 40282  |
| tr F1MZ33 F1MZ33_BOVIN | Deoxyribonuclease-2-alpha                                        | LF | 8  | 2  | 2  | Y | 40266  |
| tr F1MZF2 F1MZF2_BOVIN | Desmocollin-2                                                    | C  | 7  | 3  | 3  | N | 100553 |
| P33545 DSC2_BOVIN      | Desmocollin-2 (Fragment)                                         | LF | 7  | 2  | 2  | N | 95875  |
| tr A0JN77 A0JN77_BOVIN | Dihydroxyacetone kinase 2 homolog (S. cerevisiae)                | C  | 25 | 9  | 9  | N | 59160  |
| tr F1N455 F1N455_BOVIN | Dipeptidyl peptidase 1                                           | LF | 5  | 1  | 1  | N | 51979  |
| P81425 DPP4_BOVIN      | Dipeptidyl peptidase 4                                           | C  | 36 | 24 | 12 | Y | 88370  |
| Q10741 ADA10_BOVIN     | Disintegrin and metalloproteinase domain-containing protein 10   | C  | 6  | 3  | 3  | Y | 84188  |
| O77780 ADAM2_BOVIN     | Disintegrin and metalloproteinase domain-containing protein 2    | C  | 17 | 7  | 7  | Y | 83151  |
| A3KMX0 ER6L2_BOVIN     | DNA excision repair protein ERCC-6-like 2                        | HF | 3  | 2  | 2  | Y | 176298 |
| Q2NL21 DJC11_BOVIN     | DnaJ homolog subfamily C member 11                               | HF | 1  | 1  | 1  | N | 63237  |
| tr F1N036 F1N036_BOVIN | DnaJ homolog subfamily C member 3                                | C  | 12 | 2  | 2  | N | 57731  |
| tr V6F7Z2 V6F7Z2_BOVIN | Down syndrome cell adhesion molecule like 1                      | C  | 1  | 2  | 1  | N | 230459 |
| tr A6QNX2 A6QNX2_BOVIN | DPP7 protein                                                     | C  | 43 | 15 | 12 | Y | 53642  |
| tr Q5H9M6 Q5H9M6_BOVIN | Dynein heavy chain (Fragment)                                    | HF | 0  | 1  | 1  | Y | 501567 |
| P61285 DYL1_BOVIN      | Dynein light chain 1 cytoplasmic                                 | HF | 12 | 1  | 1  | Y | 10366  |
| Q3MHR3 DYL2_BOVIN      | Dynein light chain 2 cytoplasmic                                 | HF | 12 | 1  | 1  | Y | 10350  |
| A6QQP7 DYSF_BOVIN      | Dysferlin                                                        | HF | 0  | 2  | 1  | Y | 239311 |
| tr F1N7D7 F1N7D7_BOVIN | Dystroglycan                                                     | C  | 19 | 11 | 9  | Y | 97309  |
| A5D7F8 SH3R1_BOVIN     | E3 ubiquitin-protein ligase SH3RF1                               | LF | 1  | 1  | 1  | Y | 87592  |
| A1A4K5 ENPP2_BOVIN     | Ectonucleotide pyrophosphatase/phosphodiesterase family member 2 | C  | 7  | 3  | 3  | Y | 101717 |
| P15396 ENPP3_BOVIN     | Ectonucleotide pyrophosphatase/phosphodiesterase family member 3 | C  | 35 | 21 | 20 | Y | 99523  |
| tr G8JKZ1 G8JKZ1_BOVIN | Ectonucleotide pyrophosphatase/phosphodiesterase family member 3 | C  | 35 | 21 | 20 | Y | 99495  |

|                        |                                                      |    |    |    |    |   |        |
|------------------------|------------------------------------------------------|----|----|----|----|---|--------|
| Q5E9R3 EHD1_BOVIN      | EH domain-containing protein 1                       | C  | 34 | 12 | 8  | Y | 60682  |
| tr A7YY77 A7YY77_BOVIN | ENDOD1 protein                                       | HF | 3  | 2  | 1  | N | 54868  |
| tr Q3SZQ8 Q3SZQ8_BOVIN | Endopin 2                                            | LF | 7  | 3  | 2  | N | 47034  |
| tr Q5J801 Q5J801_BOVIN | Endopin 2B                                           | LF | 7  | 3  | 2  | N | 47002  |
| Q95M18 ENPL_BOVIN      | Endoplasmin                                          | C  | 13 | 8  | 8  | Y | 92427  |
| O02775 EAP_BOVIN       | Enteric beta-defensin                                | C  | 28 | 2  | 2  | Y | 7127   |
| Q3ZC64 EFNA1_BOVIN     | Ephrin-A1                                            | C  | 40 | 12 | 12 | Y | 23838  |
| P79345 NPC2_BOVIN      | Epididymal secretory protein E1                      | C  | 63 | 19 | 19 | Y | 16640  |
| tr A6QLT7 A6QLT7_BOVIN | EXOC6 protein                                        | LF | 1  | 2  | 0  | N | 93322  |
| tr A7E323 A7E323_BOVIN | EXOSC10 protein                                      | HF | 3  | 2  | 2  | Y | 80336  |
| P31976 EZRI_BOVIN      | Ezrin                                                | C  | 38 | 22 | 14 | Y | 68760  |
| tr F1N0Q7 F1N0Q7_BOVIN | Farnesyl pyrophosphate synthase                      | HF | 3  | 1  | 1  | Y | 95682  |
| Q71SP7 FAS_BOVIN       | Fatty acid synthase                                  | HF | 0  | 2  | 0  | N | 274552 |
| tr O77779 O77779_BOVIN | Fertilin alpha (Fragment)                            | LF | 2  | 1  | 1  | Y | 89905  |
| tr Q2KJ89 Q2KJ89_BOVIN | Fibulin 5                                            | C  | 10 | 6  | 6  | Y | 50178  |
| Q5EA62 FBLN5_BOVIN     | Fibulin-5                                            | C  | 10 | 6  | 6  | Y | 50164  |
| tr Q5FX62 Q5FX62_BOVIN | FLICE-like inhibitory protein                        | HF | 6  | 2  | 1  | Y | 55554  |
| A6QLR4 FLOT2_BOVIN     | Flotillin-2                                          | HF | 7  | 1  | 1  | Y | 46995  |
| tr G3X6T9 G3X6T9_BOVIN | Flotillin-2 (Fragment)                               | HF | 8  | 1  | 1  | Y | 42328  |
| P02702 FOLR1_BOVIN     | Folate receptor alpha                                | C  | 32 | 5  | 4  | Y | 27922  |
| tr E1BJL8 E1BJL8_BOVIN | Folate receptor alpha                                | C  | 23 | 4  | 3  | Y | 29753  |
| tr F1MT42 F1MT42_BOVIN | Follicle-stimulating hormone receptor                | HF | 2  | 1  | 1  | Y | 78030  |
| Q3SZB7 F16P1_BOVIN     | Fructose-1 6-bisphosphatase 1                        | C  | 45 | 12 | 12 | Y | 36728  |
| tr A6QLL8 A6QLL8_BOVIN | Fructose-bisphosphate aldolase                       | C  | 19 | 5  | 4  | N | 39436  |
| tr Q3ZBY4 Q3ZBY4_BOVIN | Fructose-bisphosphate aldolase                       | HF | 4  | 2  | 1  | N | 39382  |
| A6H768 GALK1_BOVIN     | Galactokinase                                        | C  | 17 | 4  | 4  | Y | 42227  |
| A7E3W2 LG3BP_BOVIN     | Galectin-3-binding protein                           | C  | 49 | 22 | 21 | Y | 62127  |
| A6QPN6 GILT_BOVIN      | Gamma-interferon-inducible lysosomal thiol reductase | C  | 32 | 5  | 5  | Y | 27490  |
| tr F1MAU3 F1MAU3_BOVIN | Gamma-interferon-inducible lysosomal thiol reductase | HF | 32 | 5  | 5  | Y | 27548  |
| tr A6QNJ8 A6QNJ8_BOVIN | GANAB protein (Fragment)                             | HF | 9  | 6  | 6  | N | 109085 |
| Q863C3 GRP_BOVIN       | Gastrin-releasing peptide                            | C  | 39 | 4  | 4  | N | 14934  |
| tr F1N1I6 F1N1I6_BOVIN | Gelsolin                                             | C  | 65 | 35 | 32 | Y | 85687  |

|                        |                                                                         |    |    |    |    |   |        |
|------------------------|-------------------------------------------------------------------------|----|----|----|----|---|--------|
| tr F1MJH1 F1MJH1_BOVIN | Gelsolin                                                                | HF | 70 | 35 | 32 | Y | 80703  |
| Q32LB5 GPRL1_BOVIN     | GLIPR1-like protein 1                                                   | C  | 37 | 7  | 7  | Y | 27167  |
| Q3ZBD7 G6PI_BOVIN      | Glucose-6-phosphate isomerase                                           | C  | 65 | 27 | 27 | Y | 62855  |
| Q2KHZ8 GLCM_BOVIN      | Glucosylceramidase                                                      | HF | 6  | 1  | 1  | Y | 59855  |
| tr F1N1D5 F1N1D5_BOVIN | Glucosylceramidase                                                      | HF | 6  | 1  | 1  | Y | 59841  |
| tr Q0P598 Q0P598_BOVIN | Glutaminyl-peptide cyclotransferase                                     | LF | 40 | 7  | 7  | Y | 41205  |
| Q28120 QPCT_BOVIN      | Glutaminyl-peptide cyclotransferase                                     | C  | 34 | 6  | 6  | Y | 41224  |
| tr F1MEM5 F1MEM5_BOVIN | Glutamyl aminopeptidase                                                 | C  | 41 | 33 | 1  | Y | 109820 |
| Q32LQ0 AMPE_BOVIN      | Glutamyl aminopeptidase                                                 | HF | 41 | 33 | 1  | Y | 109801 |
| tr G3N2N9 G3N2N9_BOVIN | Glutathione peroxidase                                                  | C  | 73 | 16 | 10 | Y | 25083  |
| tr G3X8D7 G3X8D7_BOVIN | Glutathione peroxidase                                                  | C  | 40 | 14 | 8  | Y | 25341  |
| tr F1MCF5 F1MCF5_BOVIN | Glutathione peroxidase (Fragment)                                       | C  | 65 | 16 | 9  | Y | 15659  |
| P37141 GPX3_BOVIN      | Glutathione peroxidase 3                                                | C  | 40 | 14 | 8  | Y | 25663  |
| Q9N0V4 GSTM1_BOVIN     | Glutathione S-transferase Mu 1                                          | HF | 18 | 3  | 2  | Y | 25635  |
| tr Q2KIV8 Q2KIV8_BOVIN | Glutathione S-transferase mu 3 (Brain)                                  | C  | 35 | 6  | 5  | Y | 26850  |
| Q2KJE5 G3PT_BOVIN      | Glyceraldehyde-3-phosphate dehydrogenase<br>testis-specific             | C  | 10 | 2  | 2  | N | 43288  |
| tr A5PKD6 A5PKD6_BOVIN | GNB4 protein                                                            | C  | 3  | 1  | 1  | N | 37537  |
| tr Q0VD58 Q0VD58_BOVIN | Golgi-localized protein                                                 | HF | 2  | 2  | 0  | N | 57258  |
| tr A6QLI3 A6QLI3_BOVIN | GOLSYN protein                                                          | HF | 2  | 2  | 0  | N | 73752  |
| tr A4IF70 A4IF70_BOVIN | GPR56 protein                                                           | HF | 5  | 2  | 2  | N | 76954  |
| tr Q2HJI6 Q2HJI6_BOVIN | Granulin                                                                | C  | 17 | 3  | 3  | Y | 63054  |
| tr A7E3V7 A7E3V7_BOVIN | Guanine nucleotide-binding protein beta-1 subunit<br>(Fragment)         | C  | 3  | 1  | 1  | N | 37030  |
| P62871 GBB1_BOVIN      | Guanine nucleotide-binding protein<br>G(I)/G(S)/G(T) subunit beta-1     | C  | 3  | 1  | 1  | N | 37377  |
| P11017 GBB2_BOVIN      | Guanine nucleotide-binding protein<br>G(I)/G(S)/G(T) subunit beta-2     | C  | 3  | 1  | 1  | N | 37331  |
| P04896 GNAS2_BOVIN     | Guanine nucleotide-binding protein G(s) subunit<br>alpha isoforms short | HF | 15 | 3  | 3  | Y | 45709  |
| P38409 GNA11_BOVIN     | Guanine nucleotide-binding protein subunit alpha-<br>11                 | LF | 4  | 1  | 1  | N | 42070  |
| P38408 GNA14_BOVIN     | Guanine nucleotide-binding protein subunit alpha-<br>14                 | LF | 4  | 1  | 1  | N | 41499  |

|                        |                                                |    |    |    |    |   |        |
|------------------------|------------------------------------------------|----|----|----|----|---|--------|
| tr M5FI09 M5FI09_BOVIN | HCG1658583-like                                | HF | 1  | 2  | 1  | N | 113815 |
| Q0P565 HDDC2_BOVIN     | HD domain-containing protein 2                 | HF | 8  | 1  | 1  | N | 23323  |
| tr Q2YDE6 Q2YDE6_BOVIN | HDLBP protein (Fragment)                       | HF | 6  | 2  | 1  | Y | 32663  |
| Q2TBX4 HSP13_BOVIN     | Heat shock 70 kDa protein 13                   | C  | 33 | 12 | 12 | Y | 51921  |
| P0CB32 HS71L_BOVIN     | Heat shock 70 kDa protein 1-like               | C  | 33 | 17 | 8  | Y | 70389  |
| tr A7E3S8 A7E3S8_BOVIN | Heat shock 70kD protein binding protein        | C  | 12 | 4  | 4  | N | 41445  |
| P19120 HSP7C_BOVIN     | Heat shock cognate 71 kDa protein              | C  | 9  | 6  | 0  | N | 71241  |
| tr K8FK38 K8FK38_BOVIN | Heat Shock Protein 70 (Fragment)               | HF | 15 | 9  | 2  | N | 69421  |
| Q76LV2 HS90A_BOVIN     | Heat shock protein HSP 90-alpha                | C  | 42 | 27 | 24 | Y | 84731  |
| tr G3N2V5 G3N2V5_BOVIN | Heat shock protein HSP 90-beta                 | C  | 4  | 4  | 1  | Y | 82206  |
| P34933 HSP72_BOVIN     | Heat shock-related 70 kDa protein 2            | HF | 9  | 6  | 0  | N | 69740  |
| Q3SZV7 HEMO_BOVIN      | Hemopexin                                      | C  | 27 | 6  | 6  | Y | 52209  |
| Q9MYY0 HPSE_BOVIN      | Heparanase                                     | HF | 4  | 1  | 1  | N | 61077  |
| tr F1N1G1 F1N1G1_BOVIN | Heparanase                                     | HF | 4  | 1  | 1  | N | 61133  |
| Q5E9J1 HNRPF_BOVIN     | Heterogeneous nuclear ribonucleoprotein F      | LF | 2  | 1  | 1  | N | 45689  |
|                        | Heterogeneous nuclear ribonucleoprotein U      |    |    |    |    |   |        |
| tr A2VDN7 A2VDN7_BOVIN | (Scaffold attachment factor A)                 | HF | 1  | 1  | 1  | Y | 90453  |
| tr Q5W5U3 Q5W5U3_BOVIN | Hexokinase                                     | C  | 10 | 10 | 8  | N | 102207 |
| tr F1MZV1 F1MZV1_BOVIN | Hexokinase                                     | C  | 10 | 10 | 8  | N | 102294 |
| tr F1MIM3 F1MIM3_BOVIN | Hexokinase                                     | HF | 2  | 3  | 1  | Y | 102579 |
| tr E1BLX2 E1BLX2_BOVIN | Histone-lysine N-methyltransferase             | LF | 0  | 1  | 1  | N | 186042 |
| tr F1MNT3 F1MNT3_BOVIN | Hormone-sensitive lipase                       | C  | 22 | 9  | 7  | Y | 82639  |
| tr Q2YDK3 Q2YDK3_BOVIN | Hyaluronidase                                  | C  | 9  | 3  | 3  | Y | 62299  |
| tr F1MTV1 F1MTV1_BOVIN | Hyaluronidase                                  | C  | 9  | 3  | 3  | Y | 62281  |
| tr Q05B55 Q05B55_BOVIN | IGK protein                                    | C  | 20 | 3  | 3  | N | 26591  |
| tr B0JYP6 B0JYP6_BOVIN | IGK protein                                    | C  | 20 | 3  | 3  | N | 26320  |
| tr Q3T101 Q3T101_BOVIN | IGL@ protein                                   | LF | 41 | 9  | 1  | Y | 24640  |
| tr Q1RMN8 Q1RMN8_BOVIN | Immunoglobulin light chain lambda gene cluster | LF | 43 | 9  | 1  | Y | 24536  |
| Q70IB2 RNS10_BOVIN     | Inactive ribonuclease-like protein 10          | C  | 38 | 8  | 8  | Y | 23363  |
| tr F1MUJ4 F1MUJ4_BOVIN | Inactive serine protease PAMR1                 | LF | 2  | 2  | 1  | N | 80027  |
| Q2NL29 INO1_BOVIN      | Inositol-3-phosphate synthase 1                | C  | 12 | 4  | 4  | Y | 60761  |
| tr B8QGI3 B8QGI3_BOVIN | Insulin-like growth factor 2                   | C  | 5  | 1  | 1  | Y | 19682  |
| tr I3PGL3 I3PGL3_BOVIN | Insulin-like growth factor 2 (Fragment)        | HF | 6  | 1  | 1  | Y | 15557  |

|                        |                                                                     |    |    |    |    |   |        |
|------------------------|---------------------------------------------------------------------|----|----|----|----|---|--------|
| tr Q2F6J3 Q2F6J3_BOVIN | Insulin-like growth factor 2 preproprotein (Fragment)               | HF | 9  | 1  | 1  | Y | 10782  |
| tr I6XXP7 I6XXP7_BOVIN | Insulin-like growth factor binding protein 3                        | LF | 25 | 6  | 6  | Y | 31570  |
| P07456 IGF2_BOVIN      | Insulin-like growth factor II                                       | C  | 5  | 1  | 1  | Y | 19682  |
| P20959 IBP3_BOVIN      | Insulin-like growth factor-binding protein 3                        | LF | 25 | 6  | 6  | Y | 31570  |
| Q05717 IBP5_BOVIN      | Insulin-like growth factor-binding protein 5                        | C  | 13 | 3  | 3  | Y | 30314  |
| tr F1N026 F1N026_BOVIN | Integral membrane protein 2B                                        | C  | 23 | 4  | 4  | N | 30386  |
| Q3T0P7 ITM2B_BOVIN     | Integral membrane protein 2B                                        | LF | 19 | 3  | 3  | Y | 30400  |
| tr Q2TBX9 Q2TBX9_BOVIN | Integrin alpha FG-GAP repeat containing 1                           | C  | 2  | 1  | 1  | N | 67805  |
| tr D3WYX5 D3WYX5_BOVIN | Interleukin-1 receptor-associated kinase I transcript variant 2     | HF | 2  | 2  | 1  | N | 70585  |
| tr A2VDQ0 A2VDQ0_BOVIN | Intraflagellar transport 81 homolog (Chlamydomonas)                 | HF | 1  | 1  | 1  | Y | 79485  |
| tr Q0QEQ4 Q0QEQ4_BOVIN | Isocitrate dehydrogenase 1 (Fragment)                               | HF | 11 | 3  | 3  | N | 41342  |
| Q58CS8-2 GNPTG_BOVIN   | Isoform 2 of N-acetylglucosamine-1-phosphotransferase subunit gamma | C  | 11 | 2  | 2  | N | 31407  |
| P33545-2 DSC2_BOVIN    | Isoform 2B of Desmocollin-2                                         | LF | 7  | 2  | 2  | N | 89768  |
| Q9BGI1-2 PRDX5_BOVIN   | Isoform Cytoplasmic+peroxisomal of Peroxiredoxin-5 mitochondrial    | C  | 64 | 10 | 10 | Y | 17362  |
| P23795-2 ACES_BOVIN    | Isoform H of Acetylcholinesterase                                   | HF | 2  | 3  | 0  | N | 66908  |
| Q9XT56 JAM1_BOVIN      | Junctional adhesion molecule A                                      | HF | 5  | 1  | 1  | N | 32456  |
| tr A6H7J0 A6H7J0_BOVIN | KCNA2 protein                                                       | HF | 1  | 1  | 1  | Y | 56747  |
| tr A0JN12 A0JN12_BOVIN | Kelch-like 10 (Drosophila)                                          | HF | 4  | 2  | 2  | N | 68817  |
| Q5XQN5 K2C5_BOVIN      | Keratin type II cytoskeletal 5                                      | HF | 2  | 1  | 1  | N | 62937  |
| tr M0QVZ6 M0QVZ6_BOVIN | Keratin type II cytoskeletal 5                                      | HF | 2  | 1  | 1  | N | 60667  |
| tr A7YVI7 A7YVI7_BOVIN | KIAA0415 protein (Fragment)                                         | LF | 2  | 2  | 1  | N | 81606  |
| tr E1BEN3 E1BEN3_BOVIN | Kinesin-like protein                                                | C  | 1  | 1  | 1  | N | 115147 |
| tr G3X690 G3X690_BOVIN | Kinesin-like protein                                                | HF | 1  | 2  | 1  | Y | 157581 |
| tr E1BG49 E1BG49_BOVIN | Kinesin-like protein                                                | HF | 0  | 1  | 0  | N | 317118 |
| tr E1B715 E1B715_BOVIN | Kinesin-like protein                                                | HF | 2  | 2  | 1  | N | 89819  |
| tr Q0V8E3 Q0V8E3_BOVIN | Kinesin-like protein (Fragment)                                     | C  | 1  | 1  | 1  | N | 56925  |
| tr G3MXV5 G3MXV5_BOVIN | Kinesin-like protein (Fragment)                                     | LF | 0  | 1  | 1  | Y | 190628 |
| tr F1MJK2 F1MJK2_BOVIN | Kinesin-like protein (Fragment)                                     | LF | 0  | 1  | 1  | Y | 197032 |
| tr A5D7M6 A5D7M6_BOVIN | KRT5 protein                                                        | HF | 2  | 1  | 1  | N | 62683  |

|                                |                                                             |    |    |    |    |   |        |
|--------------------------------|-------------------------------------------------------------|----|----|----|----|---|--------|
| tr A4FV94 A4FV94_BOVIN         | KRT6A protein                                               | HF | 2  | 1  | 1  | N | 60820  |
| tr F1MXX6 F1MXX6_BOVIN         | Lactadherin                                                 | C  | 23 | 9  | 9  | Y | 47846  |
| Q95114 MFGM_BOVIN              | Lactadherin                                                 | C  | 24 | 9  | 9  | Y | 47411  |
| tr B9VPZ5 B9VPZ5_BOVIN         | Lactoferrin                                                 | C  | 62 | 49 | 3  | Y | 78056  |
| tr B3VTM3 B3VTM3_BOVIN         | Lactoferrin                                                 | C  | 62 | 47 | 1  | Y | 78056  |
| tr C7FE01 C7FE01_BOVIN         | Lactoferrin (Fragment)                                      | C  | 63 | 49 | 3  | Y | 76275  |
| P24627 TRFL_BOVIN              | Lactotransferrin                                            | C  | 62 | 49 | 3  | Y | 78056  |
| Q95M12 LGMN_BOVIN              | Legumain                                                    | C  | 22 | 8  | 8  | Y | 49284  |
| tr A1L542 A1L542_BOVIN         | Leucine rich repeat containing 8 family member E (Fragment) | HF | 2  | 2  | 0  | Y | 69094  |
| tr Q29396 Q29396_BOVIN         | Leucine-rich glycoprotein homolog protein (Fragment)        | LF | 10 | 1  | 1  | N | 25653  |
| tr E1BNS9 E1BNS9_BOVIN         | L-lactate dehydrogenase                                     | C  | 30 | 9  | 7  | Y | 36015  |
| P19858 LDHA_BOVIN              | L-lactate dehydrogenase A chain                             | C  | 11 | 3  | 1  | Y | 36598  |
| tr A7YY63 A7YY63_BOVIN         | LOC100124517 protein                                        | HF | 1  | 1  | 0  | N | 74694  |
| tr A8E4M5 A8E4M5_BOVIN         | LOC100126170 protein                                        | HF | 0  | 1  | 1  | N | 151226 |
| tr A6QQ58 A6QQ58_BOVIN         | LOC504248 protein                                           | HF | 9  | 2  | 2  | Y | 35727  |
| tr A8E4Q3 A8E4Q3_BOVIN         | LOC511106 protein                                           | HF | 10 | 3  | 1  | Y | 44057  |
| tr A6QPD4 A6QPD4_BOVIN         | LOC790886 protein                                           | HF | 11 | 5  | 1  | Y | 45428  |
| Q3SX23 LONP2_BOVIN             | Lon protease homolog 2 peroxisomal                          | LF | 1  | 1  | 1  | N | 94310  |
| Q32LD3 LYPD4_BOVIN             | Ly6/PLAUR domain-containing protein 4                       | C  | 15 | 3  | 3  | Y | 26872  |
| Q9MYM4 LYAG_BOVIN              | Lysosomal alpha-glucosidase                                 | C  | 16 | 11 | 11 | Y | 104757 |
| Q29451 MA2B1_BOVIN             | Lysosomal alpha-mannosidase                                 | C  | 18 | 11 | 10 | Y | 112919 |
| Q3MI05 PPGB_BOVIN              | Lysosomal protective protein                                | C  | 31 | 14 | 14 | Y | 53980  |
| tr Q3SZJ7 Q3SZJ7_BOVIN         | Lysosomal-associated membrane protein 2                     | HF | 2  | 1  | 1  | Y | 44543  |
| Q9TTK4 LYST_BOVIN              | Lysosomal-trafficking regulator                             | C  | 0  | 2  | 1  | N | 428603 |
| tr F1MLZ4 F1MLZ4_BOVIN         | Lysosomal-trafficking regulator                             | LF | 0  | 1  | 0  | N | 428547 |
| tr A0A077S1J5 A0A077S1J5_BOVIN | Lysozyme A                                                  | LF | 16 | 2  | 2  | N | 16293  |
| Q2T9N7 LYZL4_BOVIN             | Lysozyme-like protein 4                                     | LF | 16 | 2  | 2  | N | 16293  |
| tr G3X7E0 G3X7E0_BOVIN         | Lysozyme-like protein 4                                     | LF | 16 | 2  | 2  | N | 16293  |
| Q8MJ24 LOXL4_BOVIN             | Lysyl oxidase homolog 4                                     | LF | 3  | 1  | 1  | Y | 84050  |
| tr G1K200 G1K200_BOVIN         | Lysyl oxidase homolog 4 (Fragment)                          | LF | 4  | 1  | 1  | Y | 60036  |
| P80177 MIF_BOVIN               | Macrophage migration inhibitory factor                      | C  | 17 | 2  | 2  | Y | 12343  |
| tr A0A0F7RPX0 A0A0F7RPX0_BOVIN | Macrophage migration inhibitory factor                      | C  | 17 | 2  | 2  | Y | 12343  |

|                                |                                                                                      |    |    |    |    |   |        |
|--------------------------------|--------------------------------------------------------------------------------------|----|----|----|----|---|--------|
| tr Q9XS94 Q9XS94_BOVIN         | Major fibrous sheath protein                                                         | LF | 3  | 2  | 2  | Y | 93988  |
| tr A8WDJ5 A8WDJ5_BOVIN         | Major prion protein                                                                  | C  | 9  | 2  | 2  | Y | 29391  |
| P10279 PRIO_BOVIN              | Major prion protein                                                                  | C  | 9  | 2  | 2  | Y | 28614  |
| tr K7ZJV0 K7ZJV0_BOVIN         | Major prion protein                                                                  | C  | 9  | 2  | 2  | Y | 27810  |
| tr A7J4K5 A7J4K5_BOVIN         | Major prion protein                                                                  | C  | 9  | 2  | 2  | Y | 27837  |
| tr Q2LDZ4 Q2LDZ4_BOVIN         | Major prion protein                                                                  | C  | 9  | 2  | 2  | Y | 28661  |
| tr D5G2D5 D5G2D5_BOVIN         | Major prion protein                                                                  | C  | 9  | 2  | 2  | Y | 28636  |
| tr B3F6B5 B3F6B5_BOVIN         | Major prion protein                                                                  | C  | 9  | 2  | 2  | Y | 28676  |
| tr A6YK35 A6YK35_BOVIN         | Major prion protein                                                                  | C  | 9  | 2  | 2  | Y | 28614  |
| tr Q864M0 Q864M0_BOVIN         | Major prion protein                                                                  | C  | 9  | 2  | 2  | Y | 28596  |
| tr B3GRV8 B3GRV8_BOVIN         | Major prion protein (Fragment)                                                       | C  | 11 | 2  | 2  | Y | 23470  |
| tr Q6EIP9 Q6EIP9_BOVIN         | Major prion protein (Fragment)                                                       | C  | 25 | 2  | 2  | Y | 11714  |
| Q3T145 MDHC_BOVIN              | Malate dehydrogenase cytoplasmic                                                     | C  | 13 | 3  | 3  | Y | 36438  |
| tr B8Y898 B8Y898_BOVIN         | Malic enzyme                                                                         | C  | 11 | 3  | 3  | N | 63894  |
| tr F1N3V0 F1N3V0_BOVIN         | Malic enzyme                                                                         | C  | 11 | 3  | 3  | N | 63787  |
| A6QLI0 EPDR1_BOVIN             | Mammalian ependymin-related protein 1                                                | C  | 16 | 4  | 4  | Y | 26485  |
| Q3SZI0 MPL_BOVIN               | Mannose-6-phosphate isomerase                                                        | C  | 24 | 6  | 6  | Y | 46369  |
| tr F1N327 F1N327_BOVIN         | Mannose-6-phosphate isomerase                                                        | C  | 24 | 6  | 6  | Y | 45958  |
| tr A5D7D5 A5D7D5_BOVIN         | MATN2 protein                                                                        | HF | 5  | 4  | 4  | Y | 106824 |
| tr A6H749 A6H749_BOVIN         | MATN4 protein                                                                        | HF | 16 | 1  | 1  | Y | 14106  |
| tr A6QPN5 A6QPN5_BOVIN         | Matrix metalloproteinase 2 (Gelatinase A 72kDa gelatinase 72kDa type IV collagenase) | C  | 10 | 2  | 2  | N | 73834  |
| me M02769 ALBU_BOVIN           | mature Serum albumin removed signal and pro-peptides at N-term                       | C  | 77 | 54 | 53 | Y | 66433  |
| tr A6QQ22 A6QQ22_BOVIN         | MCFD2 protein (Fragment)                                                             | LF | 10 | 1  | 1  | N | 18908  |
| tr G3MWX4 G3MWX4_BOVIN         | Membrane cofactor protein                                                            | LF | 16 | 3  | 3  | Y | 37149  |
| tr F1N4W4 F1N4W4_BOVIN         | Membrane cofactor protein                                                            | C  | 18 | 4  | 3  | Y | 39421  |
| tr A0A060INZ0 A0A060INZ0_BOVIN | Membrane cofactor protein                                                            | LF | 15 | 3  | 3  | Y | 39744  |
| tr A0A060IE95 A0A060IE95_BOVIN | Membrane cofactor protein                                                            | LF | 15 | 3  | 3  | Y | 39801  |
| tr A6QNU3 A6QNU3_BOVIN         | Membrane cofactor protein                                                            | LF | 16 | 3  | 3  | Y | 37263  |
| tr F6K7I9 F6K7I9_BOVIN         | Membrane cofactor protein                                                            | LF | 15 | 3  | 3  | Y | 40134  |
| tr F1N4W5 F1N4W5_BOVIN         | Membrane cofactor protein                                                            | LF | 15 | 3  | 3  | Y | 39944  |
| tr F1N430 F1N430_BOVIN         | Metalloproteinase inhibitor 2                                                        | C  | 84 | 61 | 59 | Y | 24387  |
| tr Q3T0K7 Q3T0K7_BOVIN         | MFGE8 protein                                                                        | HF | 23 | 9  | 9  | Y | 47862  |

|                        |                                                         |    |    |    |    |   |        |
|------------------------|---------------------------------------------------------|----|----|----|----|---|--------|
| tr Q5E9I4 Q5E9I4_BOVIN | MGAT1 protein                                           | LF | 4  | 1  | 1  | N | 51702  |
| tr A5D7E1 A5D7E1_BOVIN | MGC139254 protein                                       | HF | 10 | 5  | 1  | Y | 60931  |
| tr A4IF76 A4IF76_BOVIN | MGC140461 protein                                       | C  | 12 | 3  | 3  | Y | 24456  |
| tr A6QPE2 A6QPE2_BOVIN | MGC148336 protein                                       | LF | 8  | 1  | 1  | N | 17816  |
| tr Q9N0E6 Q9N0E6_BOVIN | Midkine                                                 | C  | 43 | 5  | 5  | Y | 15683  |
| tr Q3SZ28 Q3SZ28_BOVIN | Midkine (Neurite growth-promoting factor 2)             | C  | 43 | 5  | 5  | Y | 15743  |
| tr A5D9E8 A5D9E8_BOVIN | Mimecan                                                 | C  | 27 | 6  | 6  | N | 34196  |
| tr G3N088 G3N088_BOVIN | Mimecan                                                 | C  | 23 | 6  | 6  | N | 40598  |
| P19879 MIME_BOVIN      | Mimecan                                                 | C  | 27 | 6  | 6  | N | 34209  |
| tr G1K237 G1K237_BOVIN | Mitochondrial Rho GTPase                                | LF | 4  | 1  | 1  | Y | 72032  |
| Q2HJF8 MIRO1_BOVIN     | Mitochondrial Rho GTPase 1                              | LF | 4  | 1  | 1  | Y | 72078  |
| tr A6H797 A6H797_BOVIN | MLEC protein                                            | C  | 9  | 2  | 2  | N | 31566  |
| tr Q9N282 Q9N282_BOVIN | MMP-9 (Fragment)                                        | HF | 3  | 1  | 1  | Y | 36274  |
| Q2HJ49 MOES_BOVIN      | Moesin                                                  | HF | 11 | 8  | 1  | N | 67975  |
| tr A6QNL0 A6QNL0_BOVIN | Monocyte differentiation antigen CD14                   | C  | 10 | 3  | 3  | Y | 39922  |
| Q95122 CD14_BOVIN      | Monocyte differentiation antigen CD14                   | HF | 10 | 3  | 3  | Y | 39667  |
| tr A8DBT6 A8DBT6_BOVIN | Monocyte differentiation antigen CD14                   | HF | 10 | 3  | 3  | Y | 39668  |
| A5D7P0 MPIP3_BOVIN     | M-phase inducer phosphatase 3                           | LF | 2  | 1  | 1  | N | 53794  |
| tr A6QP39 A6QP39_BOVIN | MSLN protein                                            | C  | 62 | 24 | 22 | Y | 44291  |
| tr A7E340 A7E340_BOVIN | Mucin 15 cell surface associated                        | HF | 3  | 1  | 1  | N | 35685  |
| Q8MI01 MUC15_BOVIN     | Mucin-15                                                | HF | 3  | 1  | 1  | N | 35715  |
| tr E1BGW1 E1BGW1_BOVIN | Mucin-15                                                | HF | 3  | 1  | 1  | N | 35683  |
|                        | Multiple inositol polyphosphate histidine phosphatase 1 | LF | 4  | 1  | 1  | Y | 41435  |
| tr Q2TBT6 Q2TBT6_BOVIN | phosphatase 1                                           | LF | 4  | 1  | 1  | Y | 41435  |
| tr A6QLD6 A6QLD6_BOVIN | MYO1B protein                                           | HF | 1  | 1  | 1  | Y | 131830 |
| Q27991 MYH10_BOVIN     | Myosin-10                                               | HF | 1  | 2  | 1  | N | 229097 |
| Q9BE39 MYH7_BOVIN      | Myosin-7                                                | HF | 1  | 2  | 1  | N | 223227 |
| tr F1N2G0 F1N2G0_BOVIN | Myosin-7                                                | HF | 1  | 2  | 1  | N | 223964 |
|                        | N-acetylglucosamine-1-phosphotransferase subunit gamma  | C  | 10 | 2  | 2  | N | 33783  |
| Q58CS8 GNPTG_BOVIN     | N-acetylglucosamine-1-phosphotransferase subunit gamma  | C  | 10 | 2  | 2  | N | 33783  |
| tr M5FJT7 M5FJT7_BOVIN | subunit gamma                                           | C  | 11 | 2  | 2  | N | 31407  |
| Q1LZH9 GNS_BOVIN       | N-acetylglucosamine-6-sulfatase                         | C  | 23 | 8  | 8  | Y | 62776  |
| tr F1MXZ0 F1MXZ0_BOVIN | N-acetylglucosamine-6-sulfatase                         | C  | 23 | 8  | 8  | Y | 62800  |



|                        |                                                                    |    |    |    |    |   |        |
|------------------------|--------------------------------------------------------------------|----|----|----|----|---|--------|
| tr Q3T074 Q3T074_BOVIN | NAD(P)(+)--arginine ADP-ribosyltransferase                         | C  | 5  | 2  | 1  | Y | 43998  |
| tr F1MUE3 F1MUE3_BOVIN | NAD(P)(+)--arginine ADP-ribosyltransferase                         | C  | 5  | 2  | 1  | Y | 43969  |
| tr E1BI74 E1BI74_BOVIN | NAD(P)(+)--arginine ADP-ribosyltransferase<br>(Fragment)           | C  | 39 | 12 | 11 | Y | 33700  |
| tr A6QM01 A6QM01_BOVIN | NAGLU protein                                                      | C  | 11 | 3  | 3  | Y | 74076  |
| tr A6QNZ3 A6QNZ3_BOVIN | NCOA7 protein                                                      | HF | 3  | 1  | 1  | N | 25239  |
| tr A6QPQ1 A6QPQ1_BOVIN | NEPN protein                                                       | HF | 2  | 2  | 0  | N | 58005  |
| P02548 NFL_BOVIN       | Neurofilament light polypeptide                                    | LF | 5  | 3  | 2  | Y | 62646  |
| tr Q71UA5 Q71UA5_BOVIN | Neutrophil beta-defensin 12 (Fragment)                             | HF | 33 | 3  | 1  | Y | 6464   |
| tr A7Z034 A7Z034_BOVIN | NFKB1 protein                                                      | LF | 1  | 1  | 1  | N | 105463 |
| tr Q1RMU0 Q1RMU0_BOVIN | NGFI-A binding protein 2 (EGR1 binding protein<br>2)               | HF | 2  | 2  | 0  | N | 56513  |
| tr Q3SZQ1 Q3SZQ1_BOVIN | Nicastrin                                                          | HF | 8  | 2  | 2  | N | 79073  |
| tr A2VDU4 A2VDU4_BOVIN | NR1I2 protein                                                      | HF | 1  | 1  | 1  | N | 48525  |
| A5D7E9 NF2L1_BOVIN     | Nuclear factor erythroid 2-related factor 1                        | LF | 2  | 3  | 1  | N | 83607  |
| tr Q1KNJ0 Q1KNJ0_BOVIN | Nuclear factor of kappa light polypeptide enhancer<br>in B-cells 1 | HF | 1  | 1  | 1  | N | 105488 |
| Q32KP9 NTF2_BOVIN      | Nuclear transport factor 2                                         | C  | 34 | 2  | 2  | Y | 14478  |
| tr Q0IIH5 Q0IIH5_BOVIN | Nucleobindin 2                                                     | C  | 54 | 23 | 22 | Y | 49189  |
| Q0P569 NUCB1_BOVIN     | Nucleobindin-1                                                     | C  | 61 | 35 | 34 | Y | 54982  |
| tr Q3SZ56 Q3SZ56_BOVIN | Nucleoporin 88kDa                                                  | C  | 3  | 3  | 1  | Y | 83772  |
| tr A1A4N9 A1A4N9_BOVIN | Nucleoside diphosphate kinase                                      | HF | 62 | 6  | 4  | Y | 17325  |
| P52175 NDKA2_BOVIN     | Nucleoside diphosphate kinase A 2                                  | HF | 62 | 6  | 4  | Y | 17298  |
| Q3T0Q4 NDKB_BOVIN      | Nucleoside diphosphate kinase B                                    | HF | 61 | 6  | 4  | Y | 17316  |
| Q32KV6 SIL1_BOVIN      | Nucleotide exchange factor SIL1                                    | C  | 11 | 5  | 5  | Y | 52581  |
| tr A7MBI8 A7MBI8_BOVIN | NUDT9 protein                                                      | LF | 3  | 1  | 1  | N | 38612  |
| tr A6QM02 A6QM02_BOVIN | NUP188 protein                                                     | LF | 0  | 1  | 1  | N | 196262 |
| tr Q3T085 Q3T085_BOVIN | OGN protein                                                        | C  | 27 | 6  | 6  | N | 34197  |
| tr G3X858 G3X858_BOVIN | Olfactory receptor                                                 | HF | 2  | 1  | 1  | N | 36815  |
| tr Q17QF1 Q17QF1_BOVIN | Oncostatin M receptor                                              | C  | 13 | 3  | 3  | Y | 37601  |
| P31096 OSTP_BOVIN      | Osteopontin                                                        | C  | 57 | 36 | 7  | Y | 30904  |
| tr Q2QCT5 Q2QCT5_BOVIN | Osteopontin (Fragment)                                             | C  | 56 | 30 | 1  | Y | 29172  |
| P45478 PPT1_BOVIN      | Palmitoyl-protein thioesterase 1                                   | C  | 25 | 4  | 4  | Y | 34142  |
| tr F1MSA1 F1MSA1_BOVIN | Palmitoyl-protein thioesterase 1                                   | C  | 25 | 4  | 4  | Y | 34089  |

|                        |                                                                                |    |    |    |    |   |        |
|------------------------|--------------------------------------------------------------------------------|----|----|----|----|---|--------|
| tr M5FKI8 M5FKI8_BOVIN | Pancreatic adenocarcinoma upregulated factor-like                              | C  | 68 | 9  | 9  | N | 16970  |
| P00974 BPT1_BOVIN      | Pancreatic trypsin inhibitor                                                   | C  | 13 | 1  | 1  | Y | 10903  |
| Q58CQ9 VNN1_BOVIN      | Pantetheinase                                                                  | C  | 23 | 7  | 7  | Y | 56947  |
| tr A5D7Q6 A5D7Q6_BOVIN | PCDHGA2 protein                                                                | C  | 6  | 3  | 3  | Y | 90476  |
| tr A4IFR2 A4IFR2_BOVIN | PCSK1N protein                                                                 | C  | 36 | 7  | 6  | N | 27284  |
| tr A6QNL5 A6QNL5_BOVIN | PDIA6 protein (Fragment)                                                       | LF | 3  | 1  | 1  | N | 49624  |
| tr A1A4Q6 A1A4Q6_BOVIN | Peptidase inhibitor 3 skin-derived (SKALP)                                     | HF | 19 | 3  | 1  | N | 18376  |
| tr Q2NKS8 Q2NKS8_BOVIN | Peptidyl-prolyl cis-trans isomerase                                            | HF | 44 | 3  | 3  | N | 11945  |
| P80311 PPIB_BOVIN      | Peptidyl-prolyl cis-trans isomerase B                                          | C  | 62 | 19 | 18 | Y | 23744  |
| Q9BGI2 PRDX4_BOVIN     | Peroxiredoxin-4                                                                | HF | 16 | 3  | 3  | Y | 30741  |
| Q9BGI1 PRDX5_BOVIN     | Peroxiredoxin-5 mitochondrial                                                  | C  | 47 | 10 | 10 | Y | 23253  |
| tr A6QPB5 A6QPB5_BOVIN | PGM1 protein                                                                   | HF | 2  | 1  | 1  | N | 62197  |
| P13696 PEBP1_BOVIN     | Phosphatidylethanolamine-binding protein 1                                     | C  | 40 | 5  | 5  | N | 20986  |
| tr Q3T010 Q3T010_BOVIN | Phosphatidylethanolamine-binding protein 4                                     | C  | 63 | 10 | 10 | Y | 25146  |
| P32871 PK3CA_BOVIN     | Phosphatidylinositol 4 5-bisphosphate 3-kinase catalytic subunit alpha isoform | C  | 1  | 2  | 0  | N | 124328 |
| O02811 PI4KA_BOVIN     | Phosphatidylinositol 4-kinase alpha                                            | HF | 2  | 2  | 1  | Y | 229390 |
| tr F1MJS4 F1MJS4_BOVIN | Phosphoglucomutase-1                                                           | HF | 2  | 1  | 1  | N | 62196  |
| Q08DP0 PGM1_BOVIN      | Phosphoglucomutase-1                                                           | HF | 2  | 1  | 1  | N | 61589  |
| tr Q32KN6 Q32KN6_BOVIN | Phosphoglycerate kinase                                                        | C  | 74 | 32 | 24 | Y | 44758  |
| Q3T0P6 PGK1_BOVIN      | Phosphoglycerate kinase 1                                                      | C  | 21 | 7  | 0  | Y | 44538  |
| Q32KV0 PGAM2_BOVIN     | Phosphoglycerate mutase 2                                                      | C  | 59 | 15 | 14 | Y | 28685  |
| tr F1N2F2 F1N2F2_BOVIN | Phosphoglycerate mutase 2                                                      | C  | 59 | 15 | 14 | Y | 28699  |
| tr M5FJY9 M5FJY9_BOVIN | Phosphoglycolate phosphatase                                                   | C  | 24 | 5  | 5  | Y | 34320  |
| Q2T9S4 PGP_BOVIN       | Phosphoglycolate phosphatase                                                   | C  | 24 | 5  | 5  | Y | 34320  |
| tr F1MSD7 F1MSD7_BOVIN | Phosphoinositide phospholipase C                                               | LF | 1  | 1  | 1  | N | 136216 |
| tr Q1RML9 Q1RML9_BOVIN | Phospholipase A2 group VII (Platelet-activating factor acetylhydrolase plasma) | HF | 75 | 47 | 2  | Y | 50151  |
| tr Q9TS13 Q9TS13_BOVIN | Phospholipase C beta (Fragment)                                                | HF | 5  | 1  | 1  | N | 21128  |
| tr F1MZ89 F1MZ89_BOVIN | Phospholipid-transporting ATPase (Fragment)                                    | C  | 1  | 1  | 1  | N | 166459 |
| tr E1BN81 E1BN81_BOVIN | Phospholipid-transporting ATPase (Fragment)                                    | C  | 2  | 1  | 1  | N | 116596 |
| Q95121 PEDF_BOVIN      | Pigment epithelium-derived factor                                              | LF | 12 | 2  | 2  | N | 46229  |
| tr Q5S1W6 Q5S1W6_BOVIN | PITSLRE protein kinase beta 1                                                  | HF | 4  | 2  | 1  | N | 49529  |
| tr V6F953 V6F953_BOVIN | Placenta-expressed transcript 1 protein                                        | C  | 32 | 8  | 8  | Y | 26609  |

|                        |                                                                |    |    |    |    |   |        |
|------------------------|----------------------------------------------------------------|----|----|----|----|---|--------|
| A5D7U1 PLET1_BOVIN     | Placenta-expressed transcript 1 protein                        | C  | 32 | 8  | 8  | Y | 26609  |
| Q9N2I2 IPSP_BOVIN      | Plasma serine protease inhibitor                               | C  | 73 | 31 | 29 | Y | 45297  |
| Q28017 PAFA_BOVIN      | Platelet-activating factor acetylhydrolase                     | C  | 74 | 52 | 50 | Y | 50133  |
| Q2KJ15 PDGFA_BOVIN     | Platelet-derived growth factor subunit A                       | LF | 12 | 2  | 2  | N | 24009  |
| tr F1N2P4 F1N2P4_BOVIN | Platelet-derived growth factor subunit A                       | LF | 12 | 2  | 2  | N | 24027  |
| tr A0JN47 A0JN47_BOVIN | Plexin domain containing 2                                     | C  | 11 | 4  | 4  | N | 59468  |
| tr C0SQ70 C0SQ70_BOVIN | Plexin domain containing 2                                     | C  | 11 | 4  | 4  | N | 59215  |
| tr Q17QC7 Q17QC7_BOVIN | Poliovirus receptor-related 2 (Herpesvirus entry mediator B)   | C  | 4  | 1  | 1  | N | 43262  |
| P18493 PARP1_BOVIN     | Poly [ADP-ribose] polymerase 1                                 | LF | 1  | 1  | 1  | N | 113486 |
| tr F1MU08 F1MU08_BOVIN | Poly [ADP-ribose] polymerase 1                                 | LF | 1  | 1  | 1  | N | 113368 |
| Q4GZT3 PKD2_BOVIN      | Polycystin-2                                                   | LF | 2  | 2  | 1  | Y | 109789 |
| P81265 PIGR_BOVIN      | Polymeric immunoglobulin receptor                              | C  | 17 | 6  | 6  | Y | 82435  |
| tr E1B9U7 E1B9U7_BOVIN | Polypeptide N-acetylgalactosaminyltransferase                  | HF | 2  | 2  | 0  | N | 67746  |
| tr F1N554 F1N554_BOVIN | Polypeptide N-acetylgalactosaminyltransferase (Fragment)       | C  | 19 | 6  | 5  | Y | 63425  |
| P0CG53 UBB_BOVIN       | Polyubiquitin-B                                                | LF | 15 | 5  | 5  | Y | 34308  |
| P0CH28 UBC_BOVIN       | Polyubiquitin-C                                                | LF | 7  | 5  | 5  | Y | 77570  |
| tr E1B9K1 E1B9K1_BOVIN | Polyubiquitin-C                                                | LF | 15 | 5  | 5  | Y | 34366  |
| tr Q08635 Q08635_BOVIN | Potassium channel (BGK5) (Fragment)                            | HF | 1  | 1  | 1  | Y | 54153  |
| tr Q08D98 Q08D98_BOVIN | PPP2R5D protein (Fragment)                                     | HF | 2  | 2  | 0  | N | 71823  |
| A6QLY7 PBIP1_BOVIN     | Pre-B-cell leukemia transcription factor-interacting protein 1 | C  | 12 | 5  | 5  | Y | 80258  |
| O77588 PLOD1_BOVIN     | Procollagen-lysine 2-oxoglutarate 5-dioxygenase 1              | C  | 32 | 15 | 15 | Y | 83487  |
| P26779 SAP_BOVIN       | Prosaposin                                                     | C  | 70 | 33 | 5  | Y | 58051  |
| tr A1L555 A1L555_BOVIN | Prosaposin                                                     | C  | 58 | 30 | 2  | Y | 58168  |
| tr B1H0W7 B1H0W7_BOVIN | Prostaglandin D2 synthase 21kDa (Brain)                        | C  | 46 | 8  | 7  | Y | 21229  |
| Q32L99 PTGR2_BOVIN     | Prostaglandin reductase 2                                      | C  | 23 | 4  | 4  | Y | 38400  |
| O02853 PTGDS_BOVIN     | Prostaglandin-H2 D-isomerase                                   | C  | 46 | 8  | 7  | Y | 21229  |
| A6H730 PPAP_BOVIN      | Prostatic acid phosphatase                                     | HF | 11 | 3  | 3  | Y | 44622  |
| tr M5FI38 M5FI38_BOVIN | Protease serine 22-like                                        | HF | 19 | 3  | 3  | Y | 32255  |
| tr Q08DU0 Q08DU0_BOVIN | Protease serine 8                                              | C  | 22 | 5  | 5  | Y | 36709  |
| tr Q1JP95 Q1JP95_BOVIN | Proteasome 26S ATPase subunit 3 (Fragment)                     | HF | 4  | 1  | 1  | N | 47995  |
| tr E1BD83 E1BD83_BOVIN | Proteasome subunit alpha type                                  | C  | 4  | 1  | 1  | N | 29203  |

|                        |                                                           |    |    |   |   |   |        |
|------------------------|-----------------------------------------------------------|----|----|---|---|---|--------|
| tr G5E5C3 G5E5C3_BOVIN | Proteasome subunit alpha type                             | HF | 17 | 3 | 3 | Y | 27284  |
| tr A7E3D5 A7E3D5_BOVIN | Proteasome subunit alpha type (Fragment)                  | HF | 5  | 1 | 1 | N | 26567  |
| Q3T0X5 PSA1_BOVIN      | Proteasome subunit alpha type-1                           | C  | 30 | 5 | 5 | Y | 29586  |
| Q3ZCK9 PSA4_BOVIN      | Proteasome subunit alpha type-4                           | C  | 24 | 4 | 4 | Y | 29484  |
| Q2YDE4 PSA6_BOVIN      | Proteasome subunit alpha type-6                           | HF | 17 | 3 | 3 | Y | 27399  |
| Q3ZBG0 PSA7_BOVIN      | Proteasome subunit alpha type-7                           | HF | 4  | 1 | 1 | N | 27869  |
| tr G5E589 G5E589_BOVIN | Proteasome subunit beta type                              | C  | 28 | 5 | 5 | Y | 26318  |
| tr B0JYN8 B0JYN8_BOVIN | Proteasome subunit beta type                              | HF | 18 | 3 | 3 | N | 22993  |
| Q2TBX6 PSB1_BOVIN      | Proteasome subunit beta type-1                            | C  | 28 | 5 | 5 | Y | 26246  |
| Q5E9K0 PSB2_BOVIN      | Proteasome subunit beta type-2                            | C  | 21 | 2 | 2 | N | 22896  |
| P33672 PSB3_BOVIN      | Proteasome subunit beta type-3                            | HF | 18 | 3 | 3 | N | 22993  |
| Q32KL2 PSB5_BOVIN      | Proteasome subunit beta type-5                            | C  | 24 | 4 | 4 | Y | 28609  |
| Q3MHN0 PSB6_BOVIN      | Proteasome subunit beta type-6                            | HF | 21 | 2 | 2 | Y | 25542  |
| tr F1MTI7 F1MTI7_BOVIN | Protein CutA                                              | C  | 68 | 6 | 6 | Y | 16446  |
| tr F1N5T0 F1N5T0_BOVIN | Protein CutA                                              | C  | 59 | 6 | 6 | Y | 18932  |
| Q5E946 PARK7_BOVIN     | Protein deglycase DJ-1                                    | C  | 33 | 6 | 6 | Y | 20035  |
|                        | Protein disulfide isomerase-associated 6 (Fragment)       | LF | 7  | 1 | 1 | N | 22158  |
| tr Q0V8C4 Q0V8C4_BOVIN | Protein disulfide-isomerase                               | C  | 8  | 2 | 2 | N | 57204  |
| tr A6H7J6 A6H7J6_BOVIN | Protein disulfide-isomerase                               | C  | 2  | 1 | 1 | N | 56930  |
| tr A5D7E8 A5D7E8_BOVIN | Protein disulfide-isomerase                               | LF | 5  | 2 | 2 | N | 57266  |
| P05307 PDIA1_BOVIN     | Protein disulfide-isomerase                               | LF | 5  | 2 | 2 | N | 57266  |
| P38657 PDIA3_BOVIN     | Protein disulfide-isomerase A3                            | C  | 2  | 1 | 1 | N | 56930  |
| A5PKI3 FAM3C_BOVIN     | Protein FAM3C                                             | C  | 32 | 6 | 6 | Y | 24797  |
| Q3B7M3 FA65B_BOVIN     | Protein FAM65B                                            | HF | 1  | 2 | 0 | N | 111933 |
|                        | Protein kinase C and casein kinase substrate in neurons 2 | LF | 2  | 1 | 1 | N | 55891  |
| tr Q1RMR9 Q1RMR9_BOVIN | Protein OS-9                                              | C  | 4  | 2 | 2 | N | 75807  |
| tr F1MX65 F1MX65_BOVIN | Protein OS-9                                              | C  | 4  | 2 | 2 | N | 75779  |
| Q3MHX6 OS9_BOVIN       | Protein OS-9                                              | C  | 4  | 2 | 2 | N | 75779  |
| Q3T0W4 PP1R7_BOVIN     | Protein phosphatase 1 regulatory subunit 7                | HF | 5  | 1 | 1 | N | 41388  |
| tr Q0VC12 Q0VC12_BOVIN | Protein YIPF                                              | LF | 3  | 1 | 1 | N | 37987  |
| Q3SYY2 TPST2_BOVIN     | Protein-tyrosine sulfotransferase 2                       | C  | 12 | 4 | 3 | Y | 41967  |
| tr F1MKG9 F1MKG9_BOVIN | Protein-tyrosine sulfotransferase 2                       | LF | 12 | 2 | 2 | N | 41957  |
| tr Q3SZ81 Q3SZ81_BOVIN | PSMC3 protein (Fragment)                                  | HF | 3  | 1 | 1 | N | 48094  |
| tr Q687I9 Q687I9_BOVIN | Purine nucleoside phosphorylase                           | LF | 3  | 1 | 1 | N | 32067  |

|                        |                                                            |    |    |    |    |   |        |
|------------------------|------------------------------------------------------------|----|----|----|----|---|--------|
| P55859 PNPH_BOVIN      | Purine nucleoside phosphorylase                            | LF | 3  | 1  | 1  | N | 32037  |
| tr Q9BEG4 Q9BEG4_BOVIN | Putative alpha-2 3-sialyltransferase (Fragment)            | C  | 8  | 2  | 2  | N | 37322  |
| tr F1MIH9 F1MIH9_BOVIN | Putative phospholipase B-like 2                            | C  | 20 | 7  | 7  | Y | 65723  |
| tr A5D7Q2 A5D7Q2_BOVIN | Putative uncharacterized protein                           | C  | 26 | 7  | 7  | Y | 51671  |
| tr Q58D51 Q58D51_BOVIN | Putative uncharacterized protein DKFZp313G1735             | LF | 10 | 3  | 3  | N | 61353  |
| tr Q0V8I4 Q0V8I4_BOVIN | Putative uncharacterized protein FLJ32810                  | HF | 2  | 1  | 1  | N | 48446  |
| tr Q2NKT7 Q2NKT7_BOVIN | Putative uncharacterized protein MGC137030                 | C  | 8  | 1  | 1  | N | 16149  |
| tr A5D984 A5D984_BOVIN | Pyruvate kinase                                            | HF | 11 | 4  | 4  | Y | 57949  |
| tr Q3ZC87 Q3ZC87_BOVIN | Pyruvate kinase (Fragment)                                 | HF | 10 | 4  | 4  | Y | 61428  |
| P21856 GDIA_BOVIN      | Rab GDP dissociation inhibitor alpha                       | C  | 33 | 9  | 4  | Y | 50566  |
| P50397 GDIB_BOVIN      | Rab GDP dissociation inhibitor beta                        | C  | 20 | 6  | 1  | Y | 50488  |
| tr A6QLS9 A6QLS9_BOVIN | RAB10 protein                                              | HF | 10 | 2  | 1  | N | 22541  |
| tr Q3ZBG1 Q3ZBG1_BOVIN | RAB14 protein                                              | HF | 12 | 2  | 1  | N | 23897  |
| tr Q148J4 Q148J4_BOVIN | RAB2A member RAS oncogene family                           | LF | 13 | 2  | 2  | N | 20851  |
| Q32LP2 RADI_BOVIN      | Radixin                                                    | C  | 12 | 9  | 0  | N | 68568  |
| tr F1MJJ8 F1MJJ8_BOVIN | Radixin (Fragment)                                         | C  | 12 | 9  | 0  | N | 68584  |
| tr Q0VD52 Q0VD52_BOVIN | RAS guanyl releasing protein 3 (Calcium and DAG-regulated) | LF | 1  | 1  | 1  | Y | 78224  |
| Q2TA29 RB11A_BOVIN     | Ras-related protein Rab-11A                                | LF | 9  | 2  | 2  | N | 24470  |
| tr F2Z4D5 F2Z4D5_BOVIN | Ras-related protein Rab-11A                                | LF | 9  | 2  | 2  | N | 24394  |
| Q3MHP2 RB11B_BOVIN     | Ras-related protein Rab-11B                                | C  | 25 | 6  | 6  | N | 24488  |
| A4FV54 RAB8A_BOVIN     | Ras-related protein Rab-8A                                 | HF | 11 | 2  | 1  | N | 23684  |
| Q2HJI8 RAB8B_BOVIN     | Ras-related protein Rab-8B                                 | HF | 8  | 2  | 1  | Y | 23656  |
| tr F1N2J9 F1N2J9_BOVIN | Ras-related protein Rab-8B                                 | HF | 8  | 2  | 1  | Y | 23686  |
| P62833 RAP1A_BOVIN     | Ras-related protein Rap-1A                                 | HF | 7  | 1  | 1  | N | 20987  |
| P61223 RAP1B_BOVIN     | Ras-related protein Rap-1b                                 | HF | 7  | 1  | 1  | N | 20825  |
| Q2KI30 REEP2_BOVIN     | Receptor expression-enhancing protein 2                    | LF | 5  | 2  | 1  | N | 28440  |
| tr F1MWF1 F1MWF1_BOVIN | Receptor protein-tyrosine kinase                           | HF | 1  | 1  | 1  | Y | 151660 |
| Q3SZ41 SUH_BOVIN       | Recombining binding protein suppressor of hairless         | HF | 1  | 1  | 1  | Y | 54341  |
| P81134 RENK_BOVIN      | Renin receptor                                             | C  | 46 | 10 | 9  | Y | 39491  |
| tr G8JKY4 G8JKY4_BOVIN | Renin receptor (Fragment)                                  | C  | 46 | 10 | 9  | Y | 39481  |
| tr Q0VCQ9 Q0VCQ9_BOVIN | Reticulocalbin 2 EF-hand calcium binding domain            | HF | 39 | 10 | 10 | N | 36909  |
| tr F1MF50 F1MF50_BOVIN | Rho-associated protein kinase                              | LF | 2  | 3  | 1  | Y | 159760 |

|                        |                                                                          |    |    |    |    |   |        |
|------------------------|--------------------------------------------------------------------------|----|----|----|----|---|--------|
| tr Q58DP6 Q58DP6_BOVIN | Ribonuclease 4                                                           | C  | 52 | 10 | 10 | Y | 16938  |
| tr W0UV03 W0UV03_BOVIN | Ribonuclease A C1                                                        | C  | 71 | 48 | 36 | Y | 16377  |
| tr W0UVI3 W0UVI3_BOVIN | Ribonuclease A C2                                                        | C  | 47 | 20 | 7  | Y | 23701  |
| tr W0UV85 W0UV85_BOVIN | Ribonuclease A K1                                                        | C  | 23 | 2  | 2  | Y | 24226  |
| tr W0UV04 W0UV04_BOVIN | Ribonuclease A K2                                                        | C  | 42 | 7  | 7  | Y | 24367  |
| tr W0UVF3 W0UVF3_BOVIN | Ribonuclease A M1                                                        | C  | 39 | 7  | 7  | Y | 17714  |
| P61823 RNAS1_BOVIN     | Ribonuclease pancreatic                                                  | C  | 67 | 20 | 7  | Y | 16461  |
| Q3T114 UK114_BOVIN     | Ribonuclease UK114                                                       | HF | 10 | 1  | 1  | N | 14272  |
| tr Q3SZN8 Q3SZN8_BOVIN | Ribonuclease/angiogenin inhibitor 1                                      | HF | 8  | 2  | 2  | Y | 48850  |
| Q2HJ58 PRPS1_BOVIN     | Ribose-phosphate pyrophosphokinase 1                                     | HF | 10 | 2  | 2  | Y | 34834  |
| tr Q0III8 Q0III8_BOVIN | RNASET2 protein (Fragment)                                               | C  | 25 | 6  | 5  | Y | 32830  |
| P23439 PDE6B_BOVIN     | Rod cGMP-specific 3' 5'-cyclic phosphodiesterase subunit beta            | HF | 1  | 2  | 0  | N | 98331  |
| tr F1N0U0 F1N0U0_BOVIN | Rod cGMP-specific 3' 5'-cyclic phosphodiesterase subunit beta (Fragment) | HF | 2  | 2  | 0  | N | 70884  |
| Q0VCY0 AT2A1_BOVIN     | Sarcoplasmic/endoplasmic reticulum calcium ATPase 1                      | LF | 1  | 1  | 1  | N | 109290 |
| tr A6QPK0 A6QPK0_BOVIN | SCGB2A2 protein                                                          | C  | 74 | 10 | 10 | Y | 10427  |
| A0JNP2 SG1D_BOVIN      | Secretoglobin family 1D member                                           | C  | 52 | 4  | 4  | Y | 11294  |
| A7MB70 SEM3C_BOVIN     | Semaphorin-3C                                                            | C  | 14 | 7  | 6  | Y | 85237  |
| P04557 SFP3_BOVIN      | Seminal plasma protein A3                                                | C  | 74 | 51 | 48 | Y | 16140  |
| P81019 SFP4_BOVIN      | Seminal plasma protein BSP-30 kDa                                        | C  | 60 | 58 | 56 | Y | 21269  |
| P02784 SFP1_BOVIN      | Seminal plasma protein PDC-109                                           | C  | 79 | 81 | 78 | Y | 15481  |
| P00669 RNS_BOVIN       | Seminal ribonuclease                                                     | C  | 71 | 48 | 36 | Y | 16377  |
| tr Q2NKZ9 Q2NKZ9_BOVIN | Serine carboxypeptidase 1                                                | HF | 3  | 1  | 1  | N | 50841  |
| tr A1L543 A1L543_BOVIN | Serine carboxypeptidase 1 protein                                        | HF | 3  | 1  | 1  | N | 45844  |
| tr Q2TBS5 Q2TBS5_BOVIN | Serine peptidase inhibitor Kazal type 2 (Acrosin-trypsin inhibitor)      | C  | 31 | 2  | 2  | Y | 9391   |
| tr Q32KP8 Q32KP8_BOVIN | Serine peptidase inhibitor-like with Kunitz and WAP domains 1 (Eppin)    | C  | 41 | 5  | 5  | Y | 15093  |
| F1N152 HTRA1_BOVIN     | Serine protease HTRA1                                                    | C  | 14 | 4  | 4  | Y | 51907  |
| tr Q8HZY1 Q8HZY1_BOVIN | Serine protease inhibitor clade E member 2                               | C  | 79 | 37 | 2  | Y | 43877  |
| P01001 ISK6_BOVIN      | Serine protease inhibitor Kazal-type 6                                   | C  | 20 | 1  | 1  | Y | 8663   |
| A0JNI4 SRR_BOVIN       | Serine racemase                                                          | HF | 21 | 4  | 4  | Y | 36181  |

|                                |                                                                                           |    |    |    |    |   |        |
|--------------------------------|-------------------------------------------------------------------------------------------|----|----|----|----|---|--------|
| tr G3X6N3 G3X6N3_BOVIN         | Serotransferrin                                                                           | C  | 44 | 30 | 2  | Y | 77666  |
| Q29443 TRFE_BOVIN              | Serotransferrin                                                                           | C  | 45 | 29 | 1  | Y | 77753  |
| tr Q2HJF0 Q2HJF0_BOVIN         | Serotransferrin-like                                                                      | C  | 63 | 33 | 4  | Y | 69183  |
| Q9TTE1 SPA31_BOVIN             | Serpin A3-1                                                                               | C  | 4  | 1  | 1  | N | 46237  |
| A2I7M9 SPA32_BOVIN             | Serpin A3-2                                                                               | C  | 4  | 1  | 1  | N | 46237  |
| tr A0A0A0MP92 A0A0A0MP92_BOVIN | Serpin A3-7                                                                               | LF | 7  | 3  | 2  | N | 47016  |
| tr Q08DC0 Q08DC0_BOVIN         | Serpin peptidase inhibitor clade E (Nexin                                                 | HF | 79 | 37 | 2  | Y | 43891  |
| P02769 ALBU_BOVIN              | plasminogen activator inhibitor type 1) member 2                                          | C  | 74 | 54 | 53 | Y | 69294  |
| tr A4FV01 A4FV01_BOVIN         | Serum albumin                                                                             | HF | 1  | 1  | 1  | N | 100354 |
| tr Q2KI90 Q2KI90_BOVIN         | SF3B2 protein                                                                             | LF | 21 | 8  | 8  | Y | 59727  |
| A6BMK7 NEUR1_BOVIN             | Sialic acid acetyltransferase                                                             | C  | 31 | 6  | 6  | Y | 45433  |
| tr A5D960 A5D960_BOVIN         | Sialidase-1                                                                               | C  | 8  | 2  | 2  | N | 39002  |
| Q3MHE8 SRPR_BOVIN              | Sialyltransferase 4A                                                                      | C  | 11 | 4  | 4  | Y | 69896  |
| tr F1MNJ2 F1MNJ2_BOVIN         | Signal recognition particle receptor subunit alpha                                        | C  | 11 | 4  | 4  | Y | 65652  |
| tr Q862Q3 Q862Q3_BOVIN         | Signal recognition particle receptor subunit alpha                                        | C  | 74 | 8  | 8  | Y | 11043  |
| tr Q862K7 Q862K7_BOVIN         | Similar to beta 2-microglobulin (Fragment)                                                | HF | 14 | 1  | 1  | Y | 9252   |
| tr Q862G1 Q862G1_BOVIN         | Similar to cytoplasmic dynein light chain 1                                               | HF | 6  | 1  | 1  | Y | 15728  |
| tr Q3T0F0 Q3T0F0_BOVIN         | (Fragment)                                                                                | C  | 9  | 4  | 4  | N | 59445  |
| tr Q08DL0 Q08DL0_BOVIN         | Similar to insulin-like growth factor II (Fragment)                                       | C  | 9  | 4  | 4  | N | 63183  |
| Q32LM2 SGTA_BOVIN              | SLC3A2 protein                                                                            | HF | 4  | 1  | 1  | Y | 34213  |
| tr E1B8N5 E1B8N5_BOVIN         | SLC3A2 protein                                                                            | C  | 10 | 5  | 5  | Y | 113733 |
| P58352 GTR3_BOVIN              | Small glutamine-rich tetratricopeptide repeat-containing protein alpha                    | LF | 7  | 3  | 3  | N | 54020  |
| tr A2VDL2 A2VDL2_BOVIN         | Sodium/potassium-transporting ATPase subunit alpha                                        | LF | 7  | 3  | 3  | N | 54119  |
| tr Q58DQ6 Q58DQ6_BOVIN         | Solute carrier family 2 facilitated glucose transporter member 3                          | C  | 10 | 4  | 4  | N | 55595  |
| tr Q5EA54 Q5EA54_BOVIN         | Solute carrier family 2 (Facilitated glucose transporter) member 3                        | C  | 9  | 4  | 4  | N | 63211  |
| Q58D31 DHSO_BOVIN              | Solute carrier family 3 (Activators of dibasic and neutral amino acid transport) member 2 | C  | 25 | 6  | 6  | Y | 38099  |
|                                | Solute carrier family 3 (Activators of dibasic and neutral amino acid transport) member 2 | C  |    |    |    |   |        |
|                                | Sorbitol dehydrogenase                                                                    | C  |    |    |    |   |        |

|                        |                                                         |    |    |    |    |   |        |
|------------------------|---------------------------------------------------------|----|----|----|----|---|--------|
| tr F1MG03 F1MG03_BOVIN | Speckle targeted PIP5K1A-regulated poly(A) polymerase   | LF | 1  | 1  | 1  | N | 93798  |
| Q32PB3 SACA4_BOVIN     | Sperm acrosome membrane-associated protein 4            | C  | 35 | 2  | 2  | Y | 12964  |
| tr A4UAF1 A4UAF1_BOVIN | Sperm associated antigen 11 isoform D                   | C  | 22 | 3  | 2  | Y | 14818  |
| tr A4UAF2 A4UAF2_BOVIN | Sperm associated antigen 11 isoform E                   | C  | 35 | 3  | 2  | Y | 9244   |
| tr Q2PMM0 Q2PMM0_BOVIN | Sperm inner acrosomal membrane protein IAM38 (Fragment) | LF | 21 | 5  | 5  | Y | 34158  |
| tr Q4R0H2 Q4R0H2_BOVIN | Spermadhesin 2                                          | C  | 78 | 44 | 12 | Y | 15221  |
| P82292 Z13_BOVIN       | Spermadhesin Z13                                        | C  | 77 | 33 | 3  | Y | 13383  |
| P29392 SPAD1_BOVIN     | Spermadhesin-1                                          | C  | 85 | 56 | 55 | Y | 15036  |
| Q0VD19 ASM_BOVIN       | Sphingomyelin phosphodiesterase                         | C  | 30 | 12 | 12 | Y | 69392  |
| Q3ZCH0 GRP75_BOVIN     | Stress-70 protein mitochondrial                         | HF | 1  | 1  | 1  | N | 73742  |
| tr F1MM32 F1MM32_BOVIN | Sulfhydryl oxidase                                      | HF | 63 | 34 | 33 | Y | 63006  |
| tr A6QQA8 A6QQA8_BOVIN | Sulfhydryl oxidase                                      | C  | 63 | 34 | 33 | Y | 62975  |
| tr E1BFV8 E1BFV8_BOVIN | Sulfotransferase                                        | HF | 2  | 2  | 1  | Y | 64965  |
| P00442 SODC_BOVIN      | Superoxide dismutase [Cu-Zn]                            | C  | 47 | 5  | 1  | Y | 15683  |
| tr F1MNQ4 F1MNQ4_BOVIN | Superoxide dismutase [Cu-Zn]                            | HF | 60 | 5  | 1  | Y | 15687  |
| A0JNN2 SFTA2_BOVIN     | Surfactant-associated protein 2                         | C  | 13 | 1  | 1  | Y | 8223   |
| tr Q2NL10 Q2NL10_BOVIN | Syntaxin binding protein 2                              | HF | 7  | 2  | 2  | Y | 66384  |
| Q3ZBT5 STX7_BOVIN      | Syntaxin-7                                              | HF | 5  | 1  | 1  | N | 29656  |
| tr A5D9B6 A5D9B6_BOVIN | Syntenin                                                | HF | 8  | 1  | 1  | N | 32415  |
| tr A8PVV5 A8PVV5_BOVIN | SYPL1 protein                                           | C  | 18 | 2  | 2  | Y | 19476  |
| O97790 TBCD1_BOVIN     | TBC1 domain family member 1                             | HF | 1  | 2  | 1  | N | 132097 |
| tr G5E531 G5E531_BOVIN | T-complex protein 1 subunit alpha                       | C  | 50 | 20 | 19 | Y | 60223  |
| Q3ZBH0 TCPB_BOVIN      | T-complex protein 1 subunit beta                        | C  | 50 | 19 | 19 | Y | 57475  |
| Q2T9X2 TCPD_BOVIN      | T-complex protein 1 subunit delta                       | C  | 27 | 10 | 9  | Y | 58207  |
| tr F1N0E5 F1N0E5_BOVIN | T-complex protein 1 subunit delta                       | C  | 27 | 10 | 9  | Y | 58162  |
| Q2NKZ1 TCPH_BOVIN      | T-complex protein 1 subunit eta                         | C  | 50 | 20 | 19 | Y | 59443  |
| tr F1MWR8 F1MWR8_BOVIN | T-complex protein 1 subunit eta (Fragment)              | C  | 50 | 20 | 19 | Y | 59180  |
| Q3T0K2 TCPG_BOVIN      | T-complex protein 1 subunit gamma                       | C  | 58 | 23 | 21 | Y | 60586  |
| Q3ZCI9 TCPQ_BOVIN      | T-complex protein 1 subunit theta                       | C  | 44 | 21 | 21 | Y | 59610  |
| Q3MHL7 TCPZ_BOVIN      | T-complex protein 1 subunit zeta                        | C  | 40 | 15 | 8  | Y | 57956  |
| Q3T084 TCPW_BOVIN      | T-complex protein 1 subunit zeta-2                      | C  | 31 | 11 | 1  | Y | 58032  |
| tr F1MP48 F1MP48_BOVIN | T-complex protein 1 subunit zeta-2                      | C  | 37 | 12 | 2  | Y | 57965  |



|                        |                                                                                   |    |    |    |    |   |        |
|------------------------|-----------------------------------------------------------------------------------|----|----|----|----|---|--------|
| tr A5D7E6 A5D7E6_BOVIN | Tetraspanin                                                                       | C  | 4  | 1  | 1  | Y | 30019  |
| tr G8JKX6 G8JKX6_BOVIN | Tetraspanin (Fragment)                                                            | C  | 23 | 3  | 3  | Y | 22666  |
| Q3T0S3 TSN1_BOVIN      | Tetraspanin-1                                                                     | C  | 3  | 1  | 1  | N | 26208  |
| tr A6QPE3 A6QPE3_BOVIN | TEX101 protein                                                                    | C  | 41 | 7  | 7  | Y | 27286  |
| tr A6QQ20 A6QQ20_BOVIN | TGOLN2 protein (Fragment)                                                         | HF | 8  | 1  | 1  | N | 33444  |
| tr Q3SX33 Q3SX33_BOVIN | Thy-1 cell surface antigen                                                        | C  | 11 | 2  | 2  | N | 18012  |
|                        | Thymus HYPOCHOLESTEROLEMIC factor (TPHF) (Superoxide dismutase) (SOD) (Fragments) | HF | 63 | 5  | 1  | Y | 11344  |
| tr Q9TS96 Q9TS96_BOVIN | Thyroglobulin                                                                     | HF | 0  | 1  | 1  | Y | 303221 |
| P01267 THYG_BOVIN      | Tissue alpha-L-fucosidase                                                         | C  | 36 | 9  | 9  | Y | 54089  |
| Q2KIM0 FUCO_BOVIN      | Tissue factor pathway inhibitor 2                                                 | C  | 69 | 29 | 27 | Y | 26675  |
| Q7YRQ8 TFPI2_BOVIN     | Toll-like receptor 9                                                              | HF | 2  | 2  | 1  | Y | 115454 |
| tr Q866B2 Q866B2_BOVIN | Toll-like receptor 9                                                              | HF | 2  | 2  | 1  | Y | 115484 |
| tr A5H631 A5H631_BOVIN | Transcobalamin II                                                                 | C  | 43 | 10 | 1  | Y | 32235  |
| tr Q58CU1 Q58CU1_BOVIN | Transcobalamin-2                                                                  | C  | 54 | 21 | 11 | Y | 47958  |
| Q9XSC9 TCO2_BOVIN      | Transcription factor AEBP1                                                        | LF | 5  | 3  | 3  | Y | 82366  |
| tr O97567 O97567_BOVIN | Transforming protein RhoA                                                         | C  | 52 | 6  | 6  | Y | 21768  |
| P61585 RHOA_BOVIN      | Transitional endoplasmic reticulum ATPase                                         | C  | 18 | 8  | 8  | Y | 89303  |
| tr G3X757 G3X757_BOVIN | Transitional endoplasmic reticulum ATPase                                         | C  | 18 | 8  | 8  | Y | 89330  |
| Q3ZBT1 TERA_BOVIN      | Transmembrane protease serine                                                     | HF | 1  | 1  | 1  | N | 48397  |
| tr E1BJ94 E1BJ94_BOVIN | Triokinase/FMN cyclase                                                            | C  | 25 | 9  | 9  | N | 59131  |
| Q58DK4 TKFC_BOVIN      | Triosephosphate isomerase                                                         | LF | 5  | 1  | 1  | N | 26690  |
| Q5E956 TPIS_BOVIN      | Tripeptidyl-peptidase 1                                                           | C  | 51 | 15 | 15 | Y | 61352  |
| Q0V8B6 TPP1_BOVIN      | Tripeptidyl-peptidase 1                                                           | C  | 51 | 15 | 15 | Y | 61339  |
| tr F1MK08 F1MK08_BOVIN | Tripeptidyl-peptidase 2                                                           | C  | 14 | 11 | 11 | Y | 138361 |
| A5PK39 TPP2_BOVIN      | Tripeptidyl-peptidase 2                                                           | C  | 14 | 11 | 11 | Y | 138345 |
| tr F1N0M0 F1N0M0_BOVIN | TRMU protein                                                                      | LF | 1  | 1  | 1  | N | 95515  |
| tr A3KN16 A3KN16_BOVIN | Tubulin alpha-3 chain                                                             | LF | 32 | 8  | 8  | Y | 49926  |
| Q32KN8 TBA3_BOVIN      | Tubulin beta-2B chain                                                             | HF | 31 | 9  | 1  | Y | 49953  |
| Q6B856 TBB2B_BOVIN     | Tubulin beta-4B chain                                                             | C  | 37 | 11 | 2  | Y | 49831  |
| Q3MHM5 TBB4B_BOVIN     | Tubulin beta-6 chain                                                              | HF | 12 | 5  | 1  | Y | 49900  |
| Q2HJ81 TBB6_BOVIN      | Tubulin beta-6 chain (Fragment)                                                   | HF | 16 | 5  | 1  | Y | 39683  |
| tr G3X7R8 G3X7R8_BOVIN |                                                                                   |    |    |    |    |   |        |

|                        |                                                                 |    |    |    |    |   |        |
|------------------------|-----------------------------------------------------------------|----|----|----|----|---|--------|
| Q3T077 TPPP2_BOVIN     | Tubulin polymerization-promoting protein family member 2        | C  | 34 | 5  | 5  | N | 18564  |
| tr Q0VD44 Q0VD44_BOVIN | Twisted gastrulation homolog 1 (Drosophila)                     | C  | 16 | 2  | 2  | Y | 24937  |
| tr E1BND0 E1BND0_BOVIN | Ubiquitin carboxyl-terminal hydrolase                           | C  | 1  | 3  | 2  | Y | 294173 |
| tr J7JXJ4 J7JXJ4_BOVIN | Ubiquitin carboxyl-terminal hydrolase (Fragment)                | C  | 42 | 3  | 1  | Y | 16315  |
| tr F1N1Z2 F1N1Z2_BOVIN | Ubiquitin carboxyl-terminal hydrolase (Fragment)                | LF | 0  | 1  | 1  | Y | 157582 |
| P23356 UCHL1_BOVIN     | Ubiquitin carboxyl-terminal hydrolase isozyme L1                | HF | 22 | 4  | 2  | Y | 28335  |
| Q2TBG8 UCHL3_BOVIN     | Ubiquitin carboxyl-terminal hydrolase isozyme L3                | HF | 13 | 2  | 2  | N | 26182  |
| P62992 RS27A_BOVIN     | Ubiquitin-40S ribosomal protein S27a                            | LF | 29 | 5  | 5  | Y | 17965  |
| P63048 RL40_BOVIN      | Ubiquitin-60S ribosomal protein L40                             | C  | 53 | 7  | 7  | Y | 14728  |
| Q1RMX2 UB2D2_BOVIN     | Ubiquitin-conjugating enzyme E2 D2                              | HF | 20 | 2  | 1  | Y | 16735  |
| Q3ZCF7 UB2D3_BOVIN     | Ubiquitin-conjugating enzyme E2 D3                              | HF | 20 | 2  | 1  | Y | 16745  |
| tr Q32LF7 Q32LF7_BOVIN | UDP-Gal:betaGlcNAc beta 1 4-galactosyltransferase polypeptide 4 | C  | 51 | 18 | 16 | Y | 39461  |
| tr F1MSC3 F1MSC3_BOVIN | Uncharacterized protein                                         | C  | 6  | 10 | 8  | Y | 262684 |
| tr E1B8A0 E1B8A0_BOVIN | Uncharacterized protein                                         | C  | 16 | 4  | 4  | Y | 37787  |
| tr E1B7S8 E1B7S8_BOVIN | Uncharacterized protein                                         | C  | 15 | 4  | 4  | Y | 61273  |
| tr E1BBU4 E1BBU4_BOVIN | Uncharacterized protein                                         | C  | 1  | 1  | 1  | N | 93220  |
| tr F1MZJ5 F1MZJ5_BOVIN | Uncharacterized protein                                         | C  | 1  | 1  | 1  | N | 88174  |
| tr F1MKM4 F1MKM4_BOVIN | Uncharacterized protein                                         | C  | 5  | 2  | 2  | N | 75430  |
| tr F1MJV6 F1MJV6_BOVIN | Uncharacterized protein                                         | C  | 6  | 5  | 4  | N | 132531 |
| tr F1N1C7 F1N1C7_BOVIN | Uncharacterized protein                                         | C  | 6  | 4  | 4  | Y | 131962 |
| tr E1B8K0 E1B8K0_BOVIN | Uncharacterized protein                                         | C  | 0  | 1  | 1  | N | 156487 |
| tr F1N2J8 F1N2J8_BOVIN | Uncharacterized protein                                         | C  | 23 | 6  | 6  | Y | 39957  |
| tr E1BH06 E1BH06_BOVIN | Uncharacterized protein                                         | C  | 5  | 6  | 6  | N | 192764 |
| tr F1N6C0 F1N6C0_BOVIN | Uncharacterized protein                                         | C  | 36 | 2  | 2  | N | 16966  |
| tr F1MWD3 F1MWD3_BOVIN | Uncharacterized protein                                         | C  | 54 | 21 | 19 | Y | 59615  |
| tr F1MPE1 F1MPE1_BOVIN | Uncharacterized protein                                         | C  | 1  | 2  | 1  | N | 161717 |
| tr E1BKX1 E1BKX1_BOVIN | Uncharacterized protein                                         | C  | 4  | 3  | 3  | Y | 152767 |
| tr F1MLR4 F1MLR4_BOVIN | Uncharacterized protein                                         | C  | 33 | 7  | 7  | Y | 40688  |
| tr E1BK29 E1BK29_BOVIN | Uncharacterized protein                                         | C  | 1  | 1  | 1  | N | 108265 |
| tr F1MX50 F1MX50_BOVIN | Uncharacterized protein                                         | C  | 55 | 7  | 7  | Y | 23959  |
| tr E1BC47 E1BC47_BOVIN | Uncharacterized protein                                         | C  | 51 | 8  | 8  | Y | 28148  |
| tr F6R3I5 F6R3I5_BOVIN | Uncharacterized protein                                         | C  | 29 | 4  | 4  | Y | 27144  |

|                        |                         |   |    |    |    |   |        |
|------------------------|-------------------------|---|----|----|----|---|--------|
| tr G3MYQ2 G3MYQ2_BOVIN | Uncharacterized protein | C | 29 | 7  | 6  | Y | 19185  |
| tr F1MLE1 F1MLE1_BOVIN | Uncharacterized protein | C | 1  | 2  | 1  | N | 171480 |
| tr F1MD73 F1MD73_BOVIN | Uncharacterized protein | C | 2  | 2  | 2  | Y | 190098 |
| tr F1N724 F1N724_BOVIN | Uncharacterized protein | C | 1  | 3  | 2  | Y | 520807 |
| tr F1MK55 F1MK55_BOVIN | Uncharacterized protein | C | 0  | 2  | 1  | N | 508325 |
| tr F1N5R7 F1N5R7_BOVIN | Uncharacterized protein | C | 0  | 2  | 0  | N | 461310 |
| tr F1MJJ0 F1MJJ0_BOVIN | Uncharacterized protein | C | 0  | 1  | 1  | Y | 511306 |
| tr F1N4K6 F1N4K6_BOVIN | Uncharacterized protein | C | 1  | 2  | 1  | N | 205793 |
| tr E1BJV0 E1BJV0_BOVIN | Uncharacterized protein | C | 30 | 14 | 11 | Y | 61025  |
| tr E1B9P4 E1B9P4_BOVIN | Uncharacterized protein | C | 65 | 15 | 12 | Y | 26014  |
| tr F1MU34 F1MU34_BOVIN | Uncharacterized protein | C | 5  | 3  | 3  | N | 107063 |
| tr F1N0I3 F1N0I3_BOVIN | Uncharacterized protein | C | 2  | 3  | 1  | Y | 222214 |
| tr G3X6D5 G3X6D5_BOVIN | Uncharacterized protein | C | 1  | 1  | 1  | N | 120722 |
| tr E1BQ21 E1BQ21_BOVIN | Uncharacterized protein | C | 14 | 3  | 3  | N | 26042  |
| tr G3N1D8 G3N1D8_BOVIN | Uncharacterized protein | C | 30 | 5  | 5  | Y | 25428  |
| tr E1BDN9 E1BDN9_BOVIN | Uncharacterized protein | C | 31 | 5  | 5  | Y | 24903  |
| tr G3N2D8 G3N2D8_BOVIN | Uncharacterized protein | C | 4  | 2  | 2  | N | 60905  |
| tr E1BDY3 E1BDY3_BOVIN | Uncharacterized protein | C | 26 | 24 | 23 | Y | 134635 |
| tr E1BI28 E1BI28_BOVIN | Uncharacterized protein | C | 56 | 6  | 6  | Y | 20903  |
| tr E1BB14 E1BB14_BOVIN | Uncharacterized protein | C | 3  | 1  | 1  | N | 37254  |
| tr E1BHY6 E1BHY6_BOVIN | Uncharacterized protein | C | 17 | 3  | 3  | Y | 63081  |
| tr E1BNY8 E1BNY8_BOVIN | Uncharacterized protein | C | 0  | 1  | 1  | Y | 236171 |
| tr F1MT25 F1MT25_BOVIN | Uncharacterized protein | C | 1  | 2  | 1  | Y | 139586 |
| tr E1B782 E1B782_BOVIN | Uncharacterized protein | C | 0  | 4  | 1  | N | 528175 |
| tr F1MWF0 F1MWF0_BOVIN | Uncharacterized protein | C | 22 | 13 | 13 | Y | 116493 |
| tr E1B748 E1B748_BOVIN | Uncharacterized protein | C | 28 | 17 | 17 | Y | 111684 |
| tr F1N2D5 F1N2D5_BOVIN | Uncharacterized protein | C | 8  | 4  | 4  | Y | 61389  |
| tr E1BDR2 E1BDR2_BOVIN | Uncharacterized protein | C | 8  | 3  | 2  | N | 71516  |
| tr F1MLW7 F1MLW7_BOVIN | Uncharacterized protein | C | 43 | 8  | 8  | Y | 24397  |
| tr E1BPQ9 E1BPQ9_BOVIN | Uncharacterized protein | C | 10 | 2  | 2  | Y | 39739  |
| tr F1MS23 F1MS23_BOVIN | Uncharacterized protein | C | 52 | 6  | 6  | Y | 19711  |
| tr E1B9Y3 E1B9Y3_BOVIN | Uncharacterized protein | C | 20 | 2  | 2  | Y | 21707  |
| tr F1MYX5 F1MYX5_BOVIN | Uncharacterized protein | C | 16 | 5  | 5  | Y | 70112  |
| tr E1BLI4 E1BLI4_BOVIN | Uncharacterized protein | C | 39 | 8  | 8  | Y | 15416  |

|                        |                         |   |    |    |    |   |         |
|------------------------|-------------------------|---|----|----|----|---|---------|
| tr M5FMV7 M5FMV7_BOVIN | Uncharacterized protein | C | 19 | 6  | 6  | Y | 48013   |
| tr G3X7F3 G3X7F3_BOVIN | Uncharacterized protein | C | 27 | 15 | 1  | Y | 74145   |
| tr E1BDF3 E1BDF3_BOVIN | Uncharacterized protein | C | 47 | 20 | 20 | Y | 64357   |
| tr E1BG25 E1BG25_BOVIN | Uncharacterized protein | C | 34 | 15 | 14 | Y | 80694   |
| tr E1BM47 E1BM47_BOVIN | Uncharacterized protein | C | 14 | 15 | 13 | Y | 181029  |
| tr G3X8E3 G3X8E3_BOVIN | Uncharacterized protein | C | 54 | 6  | 6  | Y | 12534   |
| tr F1MDF2 F1MDF2_BOVIN | Uncharacterized protein | C | 55 | 6  | 6  | Y | 12293   |
| tr F1MQI3 F1MQI3_BOVIN | Uncharacterized protein | C | 0  | 3  | 1  | N | 801904  |
| tr E1B9F2 E1B9F2_BOVIN | Uncharacterized protein | C | 1  | 2  | 1  | Y | 210120  |
| tr E1BP93 E1BP93_BOVIN | Uncharacterized protein | C | 1  | 2  | 2  | N | 150932  |
| tr E1BBK6 E1BBK6_BOVIN | Uncharacterized protein | C | 33 | 17 | 17 | Y | 65042   |
| tr F1MZU2 F1MZU2_BOVIN | Uncharacterized protein | C | 14 | 5  | 4  | Y | 82992   |
| tr E1B818 E1B818_BOVIN | Uncharacterized protein | C | 13 | 6  | 6  | N | 73620   |
| tr F1MU18 F1MU18_BOVIN | Uncharacterized protein | C | 13 | 3  | 3  | Y | 37644   |
| tr E1BM92 E1BM92_BOVIN | Uncharacterized protein | C | 20 | 10 | 9  | Y | 91521   |
| tr E1BLW6 E1BLW6_BOVIN | Uncharacterized protein | C | 43 | 8  | 8  | Y | 36163   |
| tr F1MUB9 F1MUB9_BOVIN | Uncharacterized protein | C | 22 | 5  | 5  | Y | 36695   |
| tr F1MHN4 F1MHN4_BOVIN | Uncharacterized protein | C | 1  | 2  | 0  | N | 191981  |
| tr F1MGN0 F1MGN0_BOVIN | Uncharacterized protein | C | 23 | 11 | 10 | Y | 89038   |
| tr F1N0F2 F1N0F2_BOVIN | Uncharacterized protein | C | 14 | 5  | 5  | N | 59673   |
| tr F1N2B5 F1N2B5_BOVIN | Uncharacterized protein | C | 10 | 4  | 4  | N | 55479   |
| tr E1BKZ9 E1BKZ9_BOVIN | Uncharacterized protein | C | 3  | 2  | 2  | N | 91818   |
| tr E1BL78 E1BL78_BOVIN | Uncharacterized protein | C | 9  | 1  | 1  | N | 11458   |
| tr F1MQL4 F1MQL4_BOVIN | Uncharacterized protein | C | 23 | 4  | 4  | Y | 11433   |
| tr F1MHF1 F1MHF1_BOVIN | Uncharacterized protein | C | 38 | 14 | 14 | Y | 46274   |
| tr E1BGM7 E1BGM7_BOVIN | Uncharacterized protein | C | 1  | 2  | 2  | Y | 235348  |
| tr F1N757 F1N757_BOVIN | Uncharacterized protein | C | 0  | 16 | 12 | Y | 3813804 |
| tr F2Z4K0 F2Z4K0_BOVIN | Uncharacterized protein | C | 33 | 9  | 9  | Y | 49960   |
| tr E1BHT5 E1BHT5_BOVIN | Uncharacterized protein | C | 0  | 2  | 0  | N | 572608  |
| tr F1MUP9 F1MUP9_BOVIN | Uncharacterized protein | C | 9  | 3  | 3  | N | 42840   |
| tr F1N3U5 F1N3U5_BOVIN | Uncharacterized protein | C | 50 | 24 | 21 | Y | 52681   |
| tr E1BGX2 E1BGX2_BOVIN | Uncharacterized protein | C | 10 | 1  | 1  | Y | 10743   |
| tr Q3T0Z0 Q3T0Z0_BOVIN | Uncharacterized protein | C | 79 | 26 | 26 | Y | 12729   |
| tr E1BNA9 E1BNA9_BOVIN | Uncharacterized protein | C | 0  | 1  | 1  | N | 331148  |

|                        |                         |    |    |    |    |   |        |
|------------------------|-------------------------|----|----|----|----|---|--------|
| tr F1MZ96 F1MZ96_BOVIN | Uncharacterized protein | C  | 20 | 3  | 3  | N | 26562  |
| tr F1MH40 F1MH40_BOVIN | Uncharacterized protein | C  | 20 | 3  | 3  | N | 26334  |
| tr E1BGB7 E1BGB7_BOVIN | Uncharacterized protein | C  | 24 | 8  | 7  | Y | 71723  |
| tr F1MHK9 F1MHK9_BOVIN | Uncharacterized protein | C  | 2  | 3  | 3  | Y | 190767 |
| tr E1BB65 E1BB65_BOVIN | Uncharacterized protein | C  | 16 | 2  | 2  | Y | 13305  |
| tr E1BJW9 E1BJW9_BOVIN | Uncharacterized protein | C  | 8  | 7  | 7  | N | 131812 |
| tr F1MIL6 F1MIL6_BOVIN | Uncharacterized protein | LF | 14 | 3  | 3  | Y | 28981  |
| tr G3MXM6 G3MXM6_BOVIN | Uncharacterized protein | LF | 5  | 3  | 3  | Y | 82380  |
| tr F1MCK2 F1MCK2_BOVIN | Uncharacterized protein | LF | 0  | 1  | 1  | N | 586979 |
| tr F1MYH5 F1MYH5_BOVIN | Uncharacterized protein | LF | 3  | 2  | 2  | Y | 94002  |
| tr E1BNR0 E1BNR0_BOVIN | Uncharacterized protein | LF | 0  | 2  | 1  | Y | 515764 |
| tr F1N7Q8 F1N7Q8_BOVIN | Uncharacterized protein | LF | 0  | 1  | 1  | N | 226698 |
| tr E1BCE1 E1BCE1_BOVIN | Uncharacterized protein | LF | 0  | 1  | 1  | N | 208169 |
| tr F1N353 F1N353_BOVIN | Uncharacterized protein | LF | 3  | 1  | 1  | Y | 26141  |
| tr F1N1F8 F1N1F8_BOVIN | Uncharacterized protein | LF | 1  | 2  | 1  | Y | 353233 |
| tr E1BBS9 E1BBS9_BOVIN | Uncharacterized protein | LF | 1  | 2  | 1  | Y | 222998 |
| tr E1BIN5 E1BIN5_BOVIN | Uncharacterized protein | LF | 11 | 6  | 6  | N | 88959  |
| tr F1MBN4 F1MBN4_BOVIN | Uncharacterized protein | LF | 2  | 1  | 1  | N | 48095  |
| tr E1BMG2 E1BMG2_BOVIN | Uncharacterized protein | LF | 0  | 1  | 1  | N | 530231 |
| tr F1N7A1 F1N7A1_BOVIN | Uncharacterized protein | LF | 2  | 2  | 1  | N | 71038  |
| tr F1N005 F1N005_BOVIN | Uncharacterized protein | LF | 1  | 2  | 0  | N | 93356  |
| tr G3MZZ8 G3MZZ8_BOVIN | Uncharacterized protein | LF | 0  | 1  | 1  | N | 173493 |
| tr E1B725 E1B725_BOVIN | Uncharacterized protein | LF | 14 | 3  | 3  | N | 49795  |
| tr G3N2K4 G3N2K4_BOVIN | Uncharacterized protein | LF | 26 | 23 | 22 | Y | 121076 |
| tr E1BBU2 E1BBU2_BOVIN | Uncharacterized protein | LF | 1  | 1  | 1  | N | 140261 |
| tr E1BF57 E1BF57_BOVIN | Uncharacterized protein | LF | 1  | 2  | 1  | N | 99115  |
| tr F1MYA6 F1MYA6_BOVIN | Uncharacterized protein | LF | 8  | 1  | 1  | N | 17815  |
| tr F1N3S7 F1N3S7_BOVIN | Uncharacterized protein | LF | 2  | 1  | 1  | N | 98595  |
| tr G3MZN3 G3MZN3_BOVIN | Uncharacterized protein | LF | 4  | 1  | 1  | N | 36209  |
| tr E1BKX0 E1BKX0_BOVIN | Uncharacterized protein | LF | 1  | 1  | 1  | N | 80431  |
| tr F1MW79 F1MW79_BOVIN | Uncharacterized protein | LF | 9  | 1  | 1  | Y | 30881  |
| tr G3MY90 G3MY90_BOVIN | Uncharacterized protein | LF | 34 | 2  | 2  | Y | 6927   |
| tr G3MZU3 G3MZU3_BOVIN | Uncharacterized protein | LF | 4  | 1  | 1  | N | 21190  |
| tr E1BLX5 E1BLX5_BOVIN | Uncharacterized protein | LF | 3  | 1  | 1  | Y | 37899  |

|                        |                         |    |    |   |   |   |        |
|------------------------|-------------------------|----|----|---|---|---|--------|
| tr F6PZ29 F6PZ29_BOVIN | Uncharacterized protein | LF | 12 | 1 | 1 | N | 16328  |
| tr E1BKX3 E1BKX3_BOVIN | Uncharacterized protein | LF | 1  | 2 | 1 | N | 152037 |
| tr E1BCU2 E1BCU2_BOVIN | Uncharacterized protein | LF | 1  | 2 | 0 | N | 162778 |
| tr E1BJU4 E1BJU4_BOVIN | Uncharacterized protein | LF | 1  | 1 | 1 | N | 73764  |
| tr E1BIG2 E1BIG2_BOVIN | Uncharacterized protein | LF | 2  | 2 | 0 | N | 69748  |
| tr F1N6B6 F1N6B6_BOVIN | Uncharacterized protein | LF | 0  | 1 | 1 | N | 196272 |
| tr G3MXC4 G3MXC4_BOVIN | Uncharacterized protein | LF | 3  | 3 | 1 | Y | 86942  |
| tr E1BFM2 E1BFM2_BOVIN | Uncharacterized protein | LF | 3  | 1 | 1 | Y | 47274  |
| tr E1BC58 E1BC58_BOVIN | Uncharacterized protein | LF | 12 | 2 | 2 | N | 24167  |
| tr E1BHV1 E1BHV1_BOVIN | Uncharacterized protein | LF | 0  | 1 | 0 | N | 553749 |
| tr E1BE29 E1BE29_BOVIN | Uncharacterized protein | LF | 0  | 1 | 0 | N | 563805 |
| tr E1BAS6 E1BAS6_BOVIN | Uncharacterized protein | LF | 0  | 1 | 1 | Y | 301194 |
| tr F1MLJ7 F1MLJ7_BOVIN | Uncharacterized protein | LF | 0  | 1 | 1 | N | 169944 |
| tr F1MHW2 F1MHW2_BOVIN | Uncharacterized protein | LF | 1  | 1 | 1 | N | 96954  |
| tr E1BPF2 E1BPF2_BOVIN | Uncharacterized protein | LF | 0  | 1 | 1 | N | 209018 |
| tr E1BL02 E1BL02_BOVIN | Uncharacterized protein | LF | 1  | 3 | 0 | N | 141638 |
| tr G3MZQ5 G3MZQ5_BOVIN | Uncharacterized protein | LF | 1  | 1 | 1 | N | 65851  |
| tr E1BIW0 E1BIW0_BOVIN | Uncharacterized protein | LF | 1  | 2 | 1 | Y | 199465 |
| tr G3MX66 G3MX66_BOVIN | Uncharacterized protein | LF | 28 | 3 | 3 | Y | 21366  |
| tr E1BB22 E1BB22_BOVIN | Uncharacterized protein | LF | 0  | 1 | 1 | Y | 150625 |
| tr Q2TBG4 Q2TBG4_BOVIN | Uncharacterized protein | LF | 5  | 1 | 1 | N | 31207  |
| tr E1BJP1 E1BJP1_BOVIN | Uncharacterized protein | LF | 4  | 1 | 1 | N | 20655  |
| tr F1MIB3 F1MIB3_BOVIN | Uncharacterized protein | LF | 0  | 1 | 1 | N | 283429 |
| tr E1BG18 E1BG18_BOVIN | Uncharacterized protein | LF | 0  | 1 | 1 | N | 166364 |
| tr F1MDR1 F1MDR1_BOVIN | Uncharacterized protein | LF | 0  | 1 | 1 | N | 168829 |
| tr F1N369 F1N369_BOVIN | Uncharacterized protein | LF | 19 | 5 | 5 | Y | 36864  |
| tr F1MLW8 F1MLW8_BOVIN | Uncharacterized protein | LF | 11 | 3 | 1 | Y | 24624  |
| tr F1MYN4 F1MYN4_BOVIN | Uncharacterized protein | HF | 1  | 2 | 1 | Y | 176514 |
| tr E1BPL3 E1BPL3_BOVIN | Uncharacterized protein | HF | 2  | 2 | 0 | N | 83085  |
| tr F2Z4F0 F2Z4F0_BOVIN | Uncharacterized protein | HF | 15 | 4 | 4 | N | 42614  |
| tr E1BK03 E1BK03_BOVIN | Uncharacterized protein | HF | 1  | 2 | 1 | N | 125208 |
| tr E1BMU6 E1BMU6_BOVIN | Uncharacterized protein | HF | 1  | 1 | 1 | N | 89606  |
| tr E1BM36 E1BM36_BOVIN | Uncharacterized protein | HF | 1  | 1 | 1 | N | 88594  |
| tr G3MZJ0 G3MZJ0_BOVIN | Uncharacterized protein | HF | 0  | 2 | 0 | N | 269382 |

|                        |                         |    |    |   |   |   |        |
|------------------------|-------------------------|----|----|---|---|---|--------|
| tr E1B719 E1B719_BOVIN | Uncharacterized protein | HF | 0  | 2 | 0 | N | 277171 |
| tr F1MI56 F1MI56_BOVIN | Uncharacterized protein | HF | 0  | 2 | 0 | N | 275013 |
| tr E1B7G6 E1B7G6_BOVIN | Uncharacterized protein | HF | 1  | 3 | 1 | N | 156126 |
| tr E1BNA3 E1BNA3_BOVIN | Uncharacterized protein | HF | 1  | 2 | 1 | N | 127969 |
| tr E1BP14 E1BP14_BOVIN | Uncharacterized protein | HF | 1  | 2 | 2 | Y | 220695 |
| tr F1MKU0 F1MKU0_BOVIN | Uncharacterized protein | HF | 0  | 1 | 1 | N | 176556 |
| tr E1BKQ8 E1BKQ8_BOVIN | Uncharacterized protein | HF | 0  | 1 | 1 | N | 169690 |
| tr E1BJV2 E1BJV2_BOVIN | Uncharacterized protein | HF | 2  | 2 | 1 | N | 101297 |
| tr G3MWL0 G3MWL0_BOVIN | Uncharacterized protein | HF | 2  | 2 | 1 | N | 104380 |
| tr G3N157 G3N157_BOVIN | Uncharacterized protein | HF | 2  | 3 | 0 | N | 138370 |
| tr E1BNE2 E1BNE2_BOVIN | Uncharacterized protein | HF | 2  | 3 | 0 | N | 134571 |
| tr E1BI42 E1BI42_BOVIN | Uncharacterized protein | HF | 2  | 2 | 2 | Y | 127199 |
| tr E1BI97 E1BI97_BOVIN | Uncharacterized protein | HF | 1  | 3 | 2 | Y | 265693 |
| tr E1BFE5 E1BFE5_BOVIN | Uncharacterized protein | HF | 2  | 2 | 2 | Y | 87741  |
| tr F1N5K1 F1N5K1_BOVIN | Uncharacterized protein | HF | 2  | 2 | 1 | N | 89902  |
| tr F1MXP9 F1MXP9_BOVIN | Uncharacterized protein | HF | 0  | 2 | 0 | N | 369266 |
| tr E1BAK5 E1BAK5_BOVIN | Uncharacterized protein | HF | 1  | 1 | 1 | Y | 105797 |
| tr F1ME99 F1ME99_BOVIN | Uncharacterized protein | HF | 2  | 3 | 1 | N | 133544 |
| tr G5E5V6 G5E5V6_BOVIN | Uncharacterized protein | HF | 1  | 2 | 1 | N | 147931 |
| tr E1BJH3 E1BJH3_BOVIN | Uncharacterized protein | HF | 1  | 2 | 2 | Y | 269607 |
| tr F1N2L7 F1N2L7_BOVIN | Uncharacterized protein | HF | 11 | 2 | 2 | Y | 27117  |
| tr F1MRN5 F1MRN5_BOVIN | Uncharacterized protein | HF | 1  | 2 | 1 | N | 332733 |
| tr E1BJE1 E1BJE1_BOVIN | Uncharacterized protein | HF | 1  | 2 | 1 | Y | 210074 |
| tr E1B9R5 E1B9R5_BOVIN | Uncharacterized protein | HF | 0  | 2 | 1 | Y | 541373 |
| tr E1BAK4 E1BAK4_BOVIN | Uncharacterized protein | HF | 0  | 1 | 0 | N | 255551 |
| tr F2Z4F5 F2Z4F5_BOVIN | Uncharacterized protein | HF | 3  | 1 | 1 | N | 82032  |
| tr E1BG89 E1BG89_BOVIN | Uncharacterized protein | HF | 3  | 1 | 1 | N | 26175  |
| tr F1N062 F1N062_BOVIN | Uncharacterized protein | HF | 1  | 1 | 1 | Y | 121466 |
| tr E1BKH6 E1BKH6_BOVIN | Uncharacterized protein | HF | 1  | 1 | 1 | N | 55007  |
| tr F1N6H6 F1N6H6_BOVIN | Uncharacterized protein | HF | 1  | 2 | 1 | N | 109407 |
| tr E1BF15 E1BF15_BOVIN | Uncharacterized protein | HF | 1  | 1 | 1 | Y | 92868  |
| tr E1BK68 E1BK68_BOVIN | Uncharacterized protein | HF | 1  | 1 | 1 | N | 93698  |
| tr F1N6Y1 F1N6Y1_BOVIN | Uncharacterized protein | HF | 8  | 6 | 6 | N | 109472 |
| tr E1B7E3 E1B7E3_BOVIN | Uncharacterized protein | HF | 1  | 2 | 2 | Y | 259182 |

|                        |                         |    |    |    |   |   |        |
|------------------------|-------------------------|----|----|----|---|---|--------|
| tr E1B9D3 E1B9D3_BOVIN | Uncharacterized protein | HF | 1  | 2  | 1 | Y | 255399 |
| tr F1MDU9 F1MDU9_BOVIN | Uncharacterized protein | HF | 1  | 3  | 2 | N | 242247 |
| tr F1MME7 F1MME7_BOVIN | Uncharacterized protein | HF | 1  | 1  | 1 | N | 94482  |
| tr E1BLD1 E1BLD1_BOVIN | Uncharacterized protein | HF | 0  | 2  | 0 | N | 289337 |
| tr F1MNS0 F1MNS0_BOVIN | Uncharacterized protein | HF | 0  | 2  | 0 | N | 531585 |
| tr E1BE11 E1BE11_BOVIN | Uncharacterized protein | HF | 0  | 3  | 1 | N | 607353 |
| tr E1B8E7 E1B8E7_BOVIN | Uncharacterized protein | HF | 0  | 1  | 1 | Y | 345034 |
| tr E1BNY9 E1BNY9_BOVIN | Uncharacterized protein | HF | 0  | 2  | 0 | N | 482196 |
| tr E1BBJ7 E1BBJ7_BOVIN | Uncharacterized protein | HF | 1  | 2  | 1 | N | 138998 |
| tr E1B944 E1B944_BOVIN | Uncharacterized protein | HF | 2  | 2  | 1 | N | 120638 |
| tr F1N685 F1N685_BOVIN | Uncharacterized protein | HF | 1  | 2  | 1 | N | 283587 |
| tr F1MLD6 F1MLD6_BOVIN | Uncharacterized protein | HF | 1  | 1  | 1 | Y | 56294  |
| tr F1MKB0 F1MKB0_BOVIN | Uncharacterized protein | HF | 1  | 1  | 1 | Y | 56717  |
| tr E1B7K3 E1B7K3_BOVIN | Uncharacterized protein | HF | 1  | 1  | 1 | Y | 63741  |
| tr F1MYV2 F1MYV2_BOVIN | Uncharacterized protein | HF | 0  | 1  | 1 | N | 174976 |
| tr F1MBZ1 F1MBZ1_BOVIN | Uncharacterized protein | HF | 4  | 2  | 2 | N | 68916  |
| tr G3N205 G3N205_BOVIN | Uncharacterized protein | HF | 1  | 2  | 0 | N | 165709 |
| tr E1BNZ0 E1BNZ0_BOVIN | Uncharacterized protein | HF | 1  | 2  | 0 | N | 162896 |
| tr M0QVY0 M0QVY0_BOVIN | Uncharacterized protein | HF | 2  | 1  | 1 | N | 60804  |
| tr F1MUY2 F1MUY2_BOVIN | Uncharacterized protein | HF | 2  | 1  | 1 | N | 60856  |
| tr F1MEG3 F1MEG3_BOVIN | Uncharacterized protein | HF | 0  | 2  | 0 | N | 331081 |
| tr G3MXJ5 G3MXJ5_BOVIN | Uncharacterized protein | HF | 2  | 1  | 1 | Y | 44553  |
| tr F1MIA9 F1MIA9_BOVIN | Uncharacterized protein | HF | 25 | 4  | 4 | Y | 19716  |
| tr F1MI18 F1MI18_BOVIN | Uncharacterized protein | HF | 0  | 1  | 0 | N | 165758 |
| tr F1MMS7 F1MMS7_BOVIN | Uncharacterized protein | HF | 10 | 3  | 1 | Y | 43986  |
| tr E1BI82 E1BI82_BOVIN | Uncharacterized protein | HF | 61 | 32 | 4 | Y | 69149  |
| tr E1BN28 E1BN28_BOVIN | Uncharacterized protein | HF | 1  | 3  | 1 | Y | 150417 |
| tr V6F7T8 V6F7T8_BOVIN | Uncharacterized protein | HF | 2  | 2  | 0 | N | 64531  |
| tr G5E5D5 G5E5D5_BOVIN | Uncharacterized protein | HF | 0  | 2  | 1 | Y | 771059 |
| tr F6PRJ0 F6PRJ0_BOVIN | Uncharacterized protein | HF | 1  | 2  | 0 | Y | 90217  |
| tr F1MHR8 F1MHR8_BOVIN | Uncharacterized protein | HF | 5  | 4  | 4 | Y | 106937 |
| tr F1MUK2 F1MUK2_BOVIN | Uncharacterized protein | HF | 1  | 2  | 0 | N | 110415 |
| tr F1N1D8 F1N1D8_BOVIN | Uncharacterized protein | HF | 3  | 1  | 1 | Y | 55205  |
| tr E1BPL8 E1BPL8_BOVIN | Uncharacterized protein | HF | 4  | 2  | 2 | N | 85899  |



|                        |                         |    |    |   |   |   |        |
|------------------------|-------------------------|----|----|---|---|---|--------|
| tr F1MM57 F1MM57_BOVIN | Uncharacterized protein | HF | 1  | 2 | 2 | Y | 232362 |
| tr F1MG13 F1MG13_BOVIN | Uncharacterized protein | HF | 0  | 1 | 1 | N | 390074 |
| tr E1BKQ6 E1BKQ6_BOVIN | Uncharacterized protein | HF | 0  | 1 | 1 | N | 232838 |
| tr E1BKW7 E1BKW7_BOVIN | Uncharacterized protein | HF | 2  | 2 | 2 | Y | 304077 |
| tr E1BF23 E1BF23_BOVIN | Uncharacterized protein | HF | 1  | 1 | 1 | N | 165262 |
| tr F1MGM4 F1MGM4_BOVIN | Uncharacterized protein | HF | 1  | 2 | 1 | N | 267182 |
| tr F1MT60 F1MT60_BOVIN | Uncharacterized protein | HF | 0  | 3 | 1 | N | 567743 |
| tr F1MKW9 F1MKW9_BOVIN | Uncharacterized protein | HF | 1  | 1 | 1 | N | 105350 |
| tr G3MXN4 G3MXN4_BOVIN | Uncharacterized protein | HF | 1  | 1 | 1 | N | 126454 |
| tr E1BFN9 E1BFN9_BOVIN | Uncharacterized protein | HF | 0  | 1 | 1 | Y | 184471 |
| tr F1N184 F1N184_BOVIN | Uncharacterized protein | HF | 2  | 2 | 0 | N | 59371  |
| tr G3N1P3 G3N1P3_BOVIN | Uncharacterized protein | HF | 3  | 1 | 1 | Y | 62618  |
| tr F1N415 F1N415_BOVIN | Uncharacterized protein | HF | 0  | 3 | 1 | N | 547165 |
| tr E1BF59 E1BF59_BOVIN | Uncharacterized protein | HF | 1  | 3 | 1 | Y | 527646 |
| tr F1MBV2 F1MBV2_BOVIN | Uncharacterized protein | HF | 9  | 2 | 2 | Y | 35658  |
| tr E1BAF6 E1BAF6_BOVIN | Uncharacterized protein | HF | 1  | 2 | 1 | N | 229153 |
| tr E1BNJ9 E1BNJ9_BOVIN | Uncharacterized protein | HF | 18 | 3 | 3 | Y | 34079  |
| tr F1MWE0 F1MWE0_BOVIN | Uncharacterized protein | HF | 3  | 1 | 1 | N | 51055  |
| tr E1BH45 E1BH45_BOVIN | Uncharacterized protein | HF | 1  | 2 | 1 | N | 181758 |
| tr E1BHN4 E1BHN4_BOVIN | Uncharacterized protein | HF | 0  | 4 | 0 | N | 374199 |
| tr F1MMR9 F1MMR9_BOVIN | Uncharacterized protein | HF | 1  | 2 | 0 | N | 208257 |
| tr F1MPT4 F1MPT4_BOVIN | Uncharacterized protein | HF | 0  | 1 | 1 | N | 241466 |
| tr E1BBB5 E1BBB5_BOVIN | Uncharacterized protein | HF | 1  | 2 | 1 | Y | 157116 |
| tr F1MWN4 F1MWN4_BOVIN | Uncharacterized protein | HF | 1  | 2 | 1 | N | 148483 |
| tr F1MXV4 F1MXV4_BOVIN | Uncharacterized protein | HF | 1  | 2 | 1 | N | 200277 |
| tr E1BET1 E1BET1_BOVIN | Uncharacterized protein | HF | 1  | 2 | 1 | Y | 189610 |
| tr G3MZA6 G3MZA6_BOVIN | Uncharacterized protein | HF | 1  | 2 | 0 | N | 103901 |
| tr E1BLT3 E1BLT3_BOVIN | Uncharacterized protein | HF | 1  | 4 | 0 | N | 288890 |
| tr F1MHC2 F1MHC2_BOVIN | Uncharacterized protein | HF | 7  | 2 | 2 | Y | 66356  |
| tr G3MZF5 G3MZF5_BOVIN | Uncharacterized protein | HF | 2  | 2 | 0 | N | 73863  |
| tr E1BKM6 E1BKM6_BOVIN | Uncharacterized protein | HF | 1  | 2 | 1 | N | 118749 |
| tr G5E661 G5E661_BOVIN | Uncharacterized protein | HF | 0  | 2 | 0 | N | 304802 |
| tr G5E5W9 G5E5W9_BOVIN | Uncharacterized protein | HF | 0  | 2 | 0 | N | 286103 |
| tr G3N0H1 G3N0H1_BOVIN | Uncharacterized protein | HF | 1  | 1 | 1 | N | 174158 |

|                        |                                    |    |    |    |    |   |        |
|------------------------|------------------------------------|----|----|----|----|---|--------|
| tr F1MQI1 F1MQI1_BOVIN | Uncharacterized protein            | HF | 1  | 2  | 1  | N | 271479 |
| tr E1BP50 E1BP50_BOVIN | Uncharacterized protein            | HF | 1  | 1  | 1  | N | 170961 |
| tr E1BLK1 E1BLK1_BOVIN | Uncharacterized protein            | HF | 0  | 2  | 2  | N | 305194 |
| tr E1BJC6 E1BJC6_BOVIN | Uncharacterized protein            | HF | 2  | 2  | 2  | N | 61398  |
| tr F1ME38 F1ME38_BOVIN | Uncharacterized protein            | HF | 3  | 2  | 2  | N | 118792 |
| tr E1BK25 E1BK25_BOVIN | Uncharacterized protein            | HF | 0  | 1  | 1  | N | 164782 |
| tr E1BL04 E1BL04_BOVIN | Uncharacterized protein            | HF | 1  | 2  | 2  | Y | 428734 |
| tr E1BE98 E1BE98_BOVIN | Uncharacterized protein            | HF | 4  | 2  | 2  | Y | 123142 |
| tr F1MRS4 F1MRS4_BOVIN | Uncharacterized protein            | HF | 2  | 2  | 1  | N | 78635  |
| tr E1BG37 E1BG37_BOVIN | Uncharacterized protein            | HF | 2  | 2  | 1  | N | 105415 |
| tr E1BB98 E1BB98_BOVIN | Uncharacterized protein            | HF | 2  | 2  | 1  | N | 46497  |
| tr E1BKY2 E1BKY2_BOVIN | Uncharacterized protein            | HF | 16 | 2  | 2  | Y | 13235  |
| tr G5E5W7 G5E5W7_BOVIN | Uncharacterized protein            | HF | 2  | 2  | 2  | N | 96902  |
| tr F1ME41 F1ME41_BOVIN | Uncharacterized protein            | HF | 12 | 1  | 1  | Y | 10440  |
| tr G3MX54 G3MX54_BOVIN | Uncharacterized protein            | HF | 12 | 1  | 1  | Y | 10378  |
| tr F1MU57 F1MU57_BOVIN | Uncharacterized protein            | HF | 19 | 13 | 1  | Y | 88830  |
| tr E1B7A3 E1B7A3_BOVIN | Uncharacterized protein            | HF | 12 | 1  | 1  | Y | 10348  |
| tr F1MM07 F1MM07_BOVIN | Uncharacterized protein            | HF | 1  | 2  | 1  | N | 222641 |
| tr F1MTP1 F1MTP1_BOVIN | Uncharacterized protein            | HF | 0  | 1  | 0  | N | 188038 |
| tr F1MS52 F1MS52_BOVIN | Uncharacterized protein (Fragment) | C  | 0  | 1  | 1  | N | 126589 |
| tr F1MEW1 F1MEW1_BOVIN | Uncharacterized protein (Fragment) | C  | 2  | 2  | 0  | N | 85072  |
| tr G3N3E8 G3N3E8_BOVIN | Uncharacterized protein (Fragment) | C  | 1  | 1  | 1  | Y | 220525 |
| tr G3X834 G3X834_BOVIN | Uncharacterized protein (Fragment) | LF | 1  | 1  | 1  | Y | 104189 |
| tr G3X6U1 G3X6U1_BOVIN | Uncharacterized protein (Fragment) | HF | 3  | 1  | 1  | N | 55098  |
| tr F1MQ87 F1MQ87_BOVIN | Uncharacterized protein (Fragment) | HF | 3  | 1  | 1  | Y | 141516 |
| tr F1MYZ3 F1MYZ3_BOVIN | Uncharacterized protein (Fragment) | HF | 0  | 2  | 2  | Y | 526510 |
| tr F1N5D7 F1N5D7_BOVIN | Uncharacterized protein (Fragment) | HF | 1  | 1  | 1  | N | 129939 |
| tr E1BNF6 E1BNF6_BOVIN | Uncharacterized protein (Fragment) | HF | 0  | 2  | 1  | N | 401667 |
| tr E1BK38 E1BK38_BOVIN | Uncharacterized protein (Fragment) | C  | 0  | 2  | 1  | N | 567920 |
| tr F1MGY9 F1MGY9_BOVIN | Uncharacterized protein (Fragment) | C  | 37 | 10 | 10 | Y | 37107  |
| tr F1MY16 F1MY16_BOVIN | Uncharacterized protein (Fragment) | C  | 1  | 2  | 2  | Y | 256001 |
| tr F1MXF5 F1MXF5_BOVIN | Uncharacterized protein (Fragment) | C  | 0  | 2  | 1  | Y | 442146 |
| tr F1MNJ4 F1MNJ4_BOVIN | Uncharacterized protein (Fragment) | C  | 18 | 7  | 7  | Y | 55901  |
| tr E1BLB4 E1BLB4_BOVIN | Uncharacterized protein (Fragment) | C  | 0  | 2  | 1  | N | 501324 |

|                        |                                    |    |    |    |    |   |        |
|------------------------|------------------------------------|----|----|----|----|---|--------|
| tr F1MGQ1 F1MGQ1_BOVIN | Uncharacterized protein (Fragment) | C  | 64 | 29 | 29 | Y | 35108  |
| tr F1N1K6 F1N1K6_BOVIN | Uncharacterized protein (Fragment) | C  | 1  | 4  | 1  | Y | 530684 |
| tr F1N5W4 F1N5W4_BOVIN | Uncharacterized protein (Fragment) | C  | 18 | 3  | 3  | Y | 41752  |
| tr F1N3E9 F1N3E9_BOVIN | Uncharacterized protein (Fragment) | C  | 22 | 10 | 8  | N | 64127  |
| tr F1MPF3 F1MPF3_BOVIN | Uncharacterized protein (Fragment) | C  | 11 | 19 | 19 | Y | 347588 |
| tr F1MTZ4 F1MTZ4_BOVIN | Uncharacterized protein (Fragment) | C  | 0  | 1  | 1  | Y | 403272 |
| tr G3X6I0 G3X6I0_BOVIN | Uncharacterized protein (Fragment) | C  | 9  | 9  | 9  | Y | 202985 |
| tr F1MYQ7 F1MYQ7_BOVIN | Uncharacterized protein (Fragment) | C  | 1  | 3  | 1  | Y | 338694 |
| tr F1N5H2 F1N5H2_BOVIN | Uncharacterized protein (Fragment) | C  | 9  | 3  | 3  | N | 53678  |
| tr F1MZ40 F1MZ40_BOVIN | Uncharacterized protein (Fragment) | C  | 13 | 5  | 5  | Y | 74692  |
| tr F1MUX6 F1MUX6_BOVIN | Uncharacterized protein (Fragment) | C  | 38 | 6  | 5  | Y | 25067  |
| tr G3MX12 G3MX12_BOVIN | Uncharacterized protein (Fragment) | C  | 0  | 4  | 1  | N | 518272 |
| tr F1ML49 F1ML49_BOVIN | Uncharacterized protein (Fragment) | C  | 4  | 4  | 2  | N | 115899 |
| tr G3MWX7 G3MWX7_BOVIN | Uncharacterized protein (Fragment) | C  | 66 | 17 | 16 | Y | 11903  |
| tr G3MX67 G3MX67_BOVIN | Uncharacterized protein (Fragment) | C  | 12 | 4  | 4  | N | 36536  |
| tr F1N6H1 F1N6H1_BOVIN | Uncharacterized protein (Fragment) | C  | 0  | 2  | 1  | Y | 517637 |
| tr F1N6H4 F1N6H4_BOVIN | Uncharacterized protein (Fragment) | C  | 0  | 3  | 1  | Y | 824687 |
| tr F1MGK8 F1MGK8_BOVIN | Uncharacterized protein (Fragment) | C  | 4  | 3  | 3  | Y | 110281 |
| tr G3MXX5 G3MXX5_BOVIN | Uncharacterized protein (Fragment) | C  | 23 | 9  | 9  | Y | 50285  |
| tr F1N4J2 F1N4J2_BOVIN | Uncharacterized protein (Fragment) | C  | 0  | 1  | 0  | N | 518418 |
| tr F1MMM6 F1MMM6_BOVIN | Uncharacterized protein (Fragment) | C  | 16 | 12 | 12 | Y | 147331 |
| tr F1N4N6 F1N4N6_BOVIN | Uncharacterized protein (Fragment) | C  | 1  | 1  | 1  | N | 120617 |
| tr E1BJV1 E1BJV1_BOVIN | Uncharacterized protein (Fragment) | C  | 0  | 1  | 1  | Y | 414894 |
| tr F1MF78 F1MF78_BOVIN | Uncharacterized protein (Fragment) | C  | 0  | 3  | 1  | Y | 789349 |
| tr G3N0V0 G3N0V0_BOVIN | Uncharacterized protein (Fragment) | C  | 71 | 15 | 15 | Y | 35952  |
| tr F6RP72 F6RP72_BOVIN | Uncharacterized protein (Fragment) | C  | 33 | 9  | 9  | Y | 49828  |
| tr E1BDR1 E1BDR1_BOVIN | Uncharacterized protein (Fragment) | C  | 27 | 2  | 2  | Y | 21194  |
| tr G3N3C5 G3N3C5_BOVIN | Uncharacterized protein (Fragment) | C  | 8  | 5  | 5  | Y | 134188 |
| tr F1MY12 F1MY12_BOVIN | Uncharacterized protein (Fragment) | C  | 35 | 5  | 4  | Y | 24484  |
| tr F1MC52 F1MC52_BOVIN | Uncharacterized protein (Fragment) | C  | 15 | 2  | 2  | Y | 13457  |
| tr F1MPT2 F1MPT2_BOVIN | Uncharacterized protein (Fragment) | C  | 9  | 7  | 0  | Y | 112139 |
| tr F1N2X6 F1N2X6_BOVIN | Uncharacterized protein (Fragment) | C  | 10 | 5  | 5  | Y | 104842 |
| tr F1MIM0 F1MIM0_BOVIN | Uncharacterized protein (Fragment) | C  | 16 | 2  | 2  | Y | 13059  |
| tr F1N6G4 F1N6G4_BOVIN | Uncharacterized protein (Fragment) | LF | 9  | 2  | 2  | N | 41937  |

|                        |                                    |    |    |   |   |   |        |
|------------------------|------------------------------------|----|----|---|---|---|--------|
| tr G5E5C6 G5E5C6_BOVIN | Uncharacterized protein (Fragment) | LF | 24 | 5 | 1 | Y | 39701  |
| tr F1MY02 F1MY02_BOVIN | Uncharacterized protein (Fragment) | LF | 2  | 1 | 1 | Y | 89961  |
| tr F1MUM9 F1MUM9_BOVIN | Uncharacterized protein (Fragment) | LF | 1  | 1 | 1 | Y | 130506 |
| tr E1BDG9 E1BDG9_BOVIN | Uncharacterized protein (Fragment) | LF | 1  | 1 | 1 | N | 100240 |
| tr F1MX68 F1MX68_BOVIN | Uncharacterized protein (Fragment) | LF | 5  | 2 | 2 | N | 54462  |
| tr F1N6Y7 F1N6Y7_BOVIN | Uncharacterized protein (Fragment) | LF | 1  | 2 | 1 | N | 138278 |
| tr G5E513 G5E513_BOVIN | Uncharacterized protein (Fragment) | LF | 10 | 2 | 1 | Y | 49970  |
| tr G5E5T5 G5E5T5_BOVIN | Uncharacterized protein (Fragment) | LF | 6  | 2 | 1 | N | 42478  |
| tr F1N191 F1N191_BOVIN | Uncharacterized protein (Fragment) | LF | 14 | 5 | 5 | N | 65367  |
| tr F1N157 F1N157_BOVIN | Uncharacterized protein (Fragment) | LF | 1  | 2 | 1 | Y | 131193 |
| tr G5E6C5 G5E6C5_BOVIN | Uncharacterized protein (Fragment) | LF | 2  | 1 | 1 | Y | 68937  |
| tr F1MF64 F1MF64_BOVIN | Uncharacterized protein (Fragment) | LF | 1  | 2 | 1 | Y | 314665 |
| tr F1MDK3 F1MDK3_BOVIN | Uncharacterized protein (Fragment) | LF | 1  | 2 | 1 | N | 135323 |
| tr G5E562 G5E562_BOVIN | Uncharacterized protein (Fragment) | LF | 2  | 1 | 1 | N | 37891  |
| tr F1ML06 F1ML06_BOVIN | Uncharacterized protein (Fragment) | LF | 1  | 2 | 1 | Y | 119525 |
| tr F1N0J5 F1N0J5_BOVIN | Uncharacterized protein (Fragment) | LF | 1  | 1 | 1 | Y | 133637 |
| tr G3N0A8 G3N0A8_BOVIN | Uncharacterized protein (Fragment) | LF | 0  | 1 | 1 | Y | 445001 |
| tr F1MSL9 F1MSL9_BOVIN | Uncharacterized protein (Fragment) | LF | 3  | 2 | 1 | Y | 174794 |
| tr F1MJN7 F1MJN7_BOVIN | Uncharacterized protein (Fragment) | LF | 1  | 2 | 2 | Y | 227614 |
| tr F1MJN1 F1MJN1_BOVIN | Uncharacterized protein (Fragment) | LF | 1  | 2 | 2 | Y | 242067 |
| tr G5E604 G5E604_BOVIN | Uncharacterized protein (Fragment) | LF | 27 | 2 | 1 | Y | 11058  |
| tr G5E622 G5E622_BOVIN | Uncharacterized protein (Fragment) | LF | 2  | 1 | 1 | Y | 83054  |
| tr G3X800 G3X800_BOVIN | Uncharacterized protein (Fragment) | LF | 2  | 1 | 1 | Y | 69265  |
| tr G3X8C8 G3X8C8_BOVIN | Uncharacterized protein (Fragment) | LF | 4  | 1 | 1 | N | 25182  |
| tr G3N0G9 G3N0G9_BOVIN | Uncharacterized protein (Fragment) | LF | 7  | 1 | 1 | Y | 13626  |
| tr F1MVK1 F1MVK1_BOVIN | Uncharacterized protein (Fragment) | LF | 2  | 3 | 3 | N | 173973 |
| tr F1MSZ5 F1MSZ5_BOVIN | Uncharacterized protein (Fragment) | HF | 2  | 1 | 1 | Y | 87012  |
| tr F1MRA8 F1MRA8_BOVIN | Uncharacterized protein (Fragment) | HF | 8  | 3 | 3 | Y | 62927  |
| tr F1MD79 F1MD79_BOVIN | Uncharacterized protein (Fragment) | HF | 0  | 1 | 0 | N | 130053 |
| tr F1MLY7 F1MLY7_BOVIN | Uncharacterized protein (Fragment) | HF | 1  | 3 | 2 | Y | 299727 |
| tr G3MXX3 G3MXX3_BOVIN | Uncharacterized protein (Fragment) | HF | 1  | 1 | 1 | N | 208923 |
| tr F1N544 F1N544_BOVIN | Uncharacterized protein (Fragment) | HF | 1  | 2 | 1 | N | 226523 |
| tr F1N3F6 F1N3F6_BOVIN | Uncharacterized protein (Fragment) | HF | 1  | 2 | 1 | N | 220106 |
| tr F1N734 F1N734_BOVIN | Uncharacterized protein (Fragment) | HF | 1  | 2 | 2 | Y | 304704 |

|                        |                                    |    |    |   |   |   |         |
|------------------------|------------------------------------|----|----|---|---|---|---------|
| tr F1MS24 F1MS24_BOVIN | Uncharacterized protein (Fragment) | HF | 1  | 1 | 1 | N | 69174   |
| tr G3N309 G3N309_BOVIN | Uncharacterized protein (Fragment) | HF | 0  | 2 | 1 | Y | 529407  |
| tr E1B7E2 E1B7E2_BOVIN | Uncharacterized protein (Fragment) | HF | 1  | 2 | 1 | N | 221312  |
| tr F1MX04 F1MX04_BOVIN | Uncharacterized protein (Fragment) | HF | 0  | 1 | 0 | N | 178592  |
| tr F1MC84 F1MC84_BOVIN | Uncharacterized protein (Fragment) | HF | 0  | 2 | 1 | N | 503287  |
| tr F1N740 F1N740_BOVIN | Uncharacterized protein (Fragment) | HF | 0  | 2 | 0 | N | 442421  |
| tr E1BED7 E1BED7_BOVIN | Uncharacterized protein (Fragment) | HF | 0  | 3 | 0 | N | 576043  |
| tr E1BAI2 E1BAI2_BOVIN | Uncharacterized protein (Fragment) | HF | 0  | 1 | 1 | N | 115672  |
| tr G5E5T3 G5E5T3_BOVIN | Uncharacterized protein (Fragment) | HF | 1  | 1 | 1 | N | 121682  |
| tr G3MW10 G3MW10_BOVIN | Uncharacterized protein (Fragment) | HF | 1  | 1 | 1 | N | 126823  |
| tr G3MZG0 G3MZG0_BOVIN | Uncharacterized protein (Fragment) | HF | 0  | 2 | 0 | N | 391140  |
| tr F1MKJ3 F1MKJ3_BOVIN | Uncharacterized protein (Fragment) | HF | 0  | 2 | 0 | N | 392941  |
| tr E1B805 E1B805_BOVIN | Uncharacterized protein (Fragment) | HF | 1  | 2 | 1 | Y | 187266  |
| tr F1MY32 F1MY32_BOVIN | Uncharacterized protein (Fragment) | HF | 8  | 1 | 1 | N | 16898   |
| tr F1N506 F1N506_BOVIN | Uncharacterized protein (Fragment) | HF | 2  | 2 | 1 | N | 100655  |
| tr F1MLR9 F1MLR9_BOVIN | Uncharacterized protein (Fragment) | HF | 0  | 1 | 1 | N | 247870  |
| tr F1MBK4 F1MBK4_BOVIN | Uncharacterized protein (Fragment) | HF | 2  | 2 | 0 | N | 60412   |
| tr F1N1S8 F1N1S8_BOVIN | Uncharacterized protein (Fragment) | HF | 2  | 2 | 0 | N | 72696   |
| tr F1MJ07 F1MJ07_BOVIN | Uncharacterized protein (Fragment) | HF | 2  | 2 | 2 | N | 171184  |
| tr E1BP38 E1BP38_BOVIN | Uncharacterized protein (Fragment) | HF | 0  | 2 | 0 | N | 235101  |
| tr F1MHA5 F1MHA5_BOVIN | Uncharacterized protein (Fragment) | HF | 1  | 2 | 1 | Y | 555967  |
| tr F1MIL7 F1MIL7_BOVIN | Uncharacterized protein (Fragment) | HF | 3  | 1 | 1 | N | 29539   |
| tr F1MBL6 F1MBL6_BOVIN | Uncharacterized protein (Fragment) | HF | 0  | 2 | 0 | N | 407888  |
| tr F1MRK2 F1MRK2_BOVIN | Uncharacterized protein (Fragment) | HF | 0  | 2 | 1 | N | 402590  |
| tr F1MGT1 F1MGT1_BOVIN | Uncharacterized protein (Fragment) | HF | 0  | 2 | 0 | N | 1005129 |
| tr F1N6T6 F1N6T6_BOVIN | Uncharacterized protein (Fragment) | HF | 2  | 1 | 1 | Y | 149981  |
| tr F1MDH3 F1MDH3_BOVIN | Uncharacterized protein (Fragment) | HF | 0  | 2 | 0 | N | 270813  |
| tr F1MBJ7 F1MBJ7_BOVIN | Uncharacterized protein (Fragment) | HF | 2  | 3 | 0 | N | 116096  |
| tr F1N6I9 F1N6I9_BOVIN | Uncharacterized protein (Fragment) | HF | 0  | 1 | 1 | Y | 219726  |
| tr E1BE64 E1BE64_BOVIN | Uncharacterized protein (Fragment) | HF | 2  | 3 | 1 | Y | 103705  |
| tr G5E6J5 G5E6J5_BOVIN | Uncharacterized protein (Fragment) | HF | 3  | 2 | 1 | N | 49922   |
| tr F1ML28 F1ML28_BOVIN | Uncharacterized protein (Fragment) | HF | 3  | 2 | 2 | Y | 74213   |
| tr F1MJU4 F1MJU4_BOVIN | Uncharacterized protein (Fragment) | HF | 1  | 1 | 1 | Y | 140767  |
| tr G3MXG6 G3MXG6_BOVIN | Uncharacterized protein (Fragment) | HF | 19 | 1 | 1 | Y | 14759   |

|                        |                                                                      |    |    |    |    |   |        |
|------------------------|----------------------------------------------------------------------|----|----|----|----|---|--------|
| tr E1BFN5 E1BFN5_BOVIN | Uncharacterized protein (Fragment)2                                  | HF | 35 | 22 | 2  | Y | 78385  |
| P10568 MYO1A_BOVIN     | Unconventional myosin-Ia                                             | HF | 1  | 1  | 1  | Y | 118869 |
| Q07130 UGPA_BOVIN      | UTP--glucose-1-phosphate uridylyltransferase                         | C  | 26 | 9  | 9  | N | 56903  |
| tr Q2KJ80 Q2KJ80_BOVIN | Vacuolar protein sorting 33 homolog A (S. cerevisiae)                | LF | 1  | 1  | 1  | N | 67508  |
| tr A5D9D1 A5D9D1_BOVIN | Vanin 2                                                              | C  | 50 | 24 | 21 | Y | 52621  |
| P63026 VAMP2_BOVIN     | Vesicle-associated membrane protein 2                                | LF | 21 | 1  | 1  | N | 12649  |
| tr F1MDK1 F1MDK1_BOVIN | Vesicle-associated membrane protein 2 (Fragment)                     | LF | 21 | 1  | 1  | N | 12517  |
| Q2KJD2 VAMP3_BOVIN     | Vesicle-associated membrane protein 3                                | C  | 39 | 5  | 5  | N | 11535  |
| tr G3X752 G3X752_BOVIN | Vesicle-associated membrane protein 3 (Fragment)                     | C  | 40 | 5  | 5  | N | 11404  |
| P81401 VIP_BOVIN       | VIP peptides                                                         | C  | 77 | 18 | 18 | Y | 19165  |
| tr I7CT57 I7CT57_BOVIN | Vitamin D binding protein                                            | LF | 6  | 2  | 2  | N | 53328  |
| tr F1N5M2 F1N5M2_BOVIN | Vitamin D-binding protein                                            | LF | 6  | 2  | 2  | N | 53356  |
| Q3MHN5 VTDB_BOVIN      | Vitamin D-binding protein                                            | LF | 6  | 2  | 2  | N | 53342  |
| P07224 PROS_BOVIN      | Vitamin K-dependent protein S                                        | LF | 3  | 2  | 2  | Y | 75133  |
| P31404 VATA_BOVIN      | V-type proton ATPase catalytic subunit A                             | C  | 21 | 8  | 8  | Y | 68344  |
| P31408 VATB2_BOVIN     | V-type proton ATPase subunit B brain isoform                         | HF | 31 | 9  | 9  | Y | 56577  |
| Q32LB7 VATE2_BOVIN     | V-type proton ATPase subunit E 2                                     | C  | 12 | 3  | 3  | N | 26171  |
| P40682 VAS1_BOVIN      | V-type proton ATPase subunit S1                                      | C  | 22 | 6  | 6  | Y | 51781  |
| tr Q0VD14 Q0VD14_BOVIN | WDR45-like                                                           | HF | 2  | 1  | 1  | N | 38094  |
| Q9GLM3 RPGR1_BOVIN     | X-linked retinitis pigmentosa GTPase regulator-interacting protein 1 | HF | 1  | 2  | 1  | N | 138433 |
| O97764 QOR_BOVIN       | Zeta-crystallin                                                      | C  | 24 | 5  | 5  | Y | 35383  |
| tr A7E3P5 A7E3P5_BOVIN | Zinc binding alcohol dehydrogenase domain containing 1               | C  | 28 | 4  | 4  | Y | 32091  |
| Q3ZCH5 ZA2G_BOVIN      | Zinc-alpha-2-glycoprotein                                            | C  | 61 | 23 | 23 | Y | 33852  |
| tr Q32KZ7 Q32KZ7_BOVIN | Zona pellucida binding protein                                       | LF | 19 | 5  | 5  | Y | 36956  |
